# Supplementary material for: Integrated gut microbiome and metabolome analysis reveals the inhibition effect of Lactobacillus plantarum CBT against colorectal cancer
Source: Royal Society of Chemistry journal article supplement (doi:10.1039/d3fo04806c), 2023-12-07
Supplement: d3fo04806c1.pdf [file d3fo04806c1.pdf]

Integrated gut microbiome and metabolome analysis reveal that the  
inhibition effect of *Lactobacillus plantarum* CBT against colorectal  
cancer

Yan-Yan Chen<sup>1,2</sup>, Fei Fei<sup>1</sup>, Ling-Ling Ding<sup>1</sup>, Shi-Yuan Wen<sup>3</sup>, Cai-Fang Ren<sup>1</sup>, Ai-

Hua Gong<sup>\*1,2,4</sup>

1. School of Medicine, Jiangsu University, Zhenjiang, Jiangsu, 212003, China
2. Hematological Disease Institute of Jiangsu University, Affiliated Hospital of Jiangsu University, Jiangsu University, Zhenjiang, 212003, China.
3. College of Basic Medical Sciences, Shanxi Medical University, Taiyuan 030000, China.
4. \*Corresponding Author: Aihua Gong (Email address: ahg5@ujs.edu.cn)

Table S1 Heatmap displaying changed bacterial species

Table S2 Relative abundance of functional pathways with differential bacteria

Table S3 Association between microbiota and cytokines

Table S4 Differential metabolites-AOM-DSS vs NC

Table S5 Differential metabolites-LP-CBT vs AOM-DSS

Table S6 Heatmap of 63 differentially metabolites

Table S7 Arginine pathway associated metabolites
