# Supplementary material for: Integrated gut microbiome and metabolome analysis reveals the inhibition effect of Lactobacillus plantarum CBT against colorectal cancer
Source: Royal Society of Chemistry journal article supplement (doi:10.1039/d3fo04806c), 2023-12-07
Supplement: d3fo04806c2.xlsx [file d3fo04806c2.xlsx]

## Sheet: Sheet1
sample	NC1	NC2	NC3	NC4	NC5	NC6	NC7	M1	M2	M3	M4	M5	M6	M7	LP1	LP2	LP3	LP4	LP5	LP6	LP7
Lactobacillus	19.0469	12.04	25.9228	38.7235	18.1755	22.3177	11.0133	20.4655	13.4428	4.65929	13.1114	25.284	5.23421	13.3454	49.6837	28.7987	36.5431	23.2595	24.1321	23.1532	12.1654
Oscillospira	3.20744	1.53192	4.69462	8.06849	5.29471	1.28286	1.27765	0.204073	1.0653	9.83204	9.64101	0.596922	8.45332	2.12345	1.18468	7.10096	1.96147	5.00793	2.1654	1.97543	4.32343
Bacteroides	0.646208	0.277096	0.402773	1.42491	0.75585	0.86676	0.646533	5.98585	10.1037	7.45596	4.58919	10.4992	5.12753	8.12321	6.56304	2.10756	1.64153	3.79632	5.74311	1.98643	2.43298
Allobaculum	5.02065	3.79033	2.01519	1.93246	0.789638	2.82305	2.14314	4.63202	4.48909	1.64823	4.98207	1.51106	5.23185	1.96425	0.093733	1.23859	2.41371	0.067619	0.086214	1.05683	1.68521
Turicibacter	0.045736	0.054558	0.021129	0.078019	0.041297	0.033288	0.045765	16.1721	9.90639	3.14762	7.21688	2.18943	4.13454	7.18736	0	0.011479	0.036449	0	0.017865	0	0.275986
Coprococcus	3.2694	1.52618	2.60152	2.86611	4.22475	0.951259	1.5655	1.00473	0.414768	0.548955	0.674714	1.37174	0.546343	0.976547	0.821899	3.37026	2.30031	0.814186	0.876365	1.67643	3.29854
Prevotella	1.87814	1.45583	1.41829	1.53293	1.26017	3.11496	1.58762	0.468933	0.641798	4.24143	1.50174	1.42318	0.765123	4.08175	1.71236	0.955059	0.391485	1.60905	0.973651	1.76525	1.19877
Helicobacter	1.09029	0.808316	1.36283	1.49607	6.69003	0.613261	3.97615	1.24007	0.826042	0.771542	1.02488	1.96438	1.76514	1.17654	0.399233	2.51851	1.2595	1.35652	0.541654	2.18765	1.87345
Bifidobacterium	0.066391	0.071787	0.010565	0.006859	0.013766	0.066575	0.065321	4.99848	7.59155	2.08385	4.99848	3.44972	4.76176	7.18377	0.019962	1.20875	2.86999	0.0138	0.192863	0.016872	2.81738
[Ruminococcus]	0.485394	0.208181	1.03004	1.1034	0.989864	0.289347	0.316543	0.266597	0.368488	2.89499	3.10738	0.151106	0.271873	0.371631	1.10657	1.68742	0.241641	1.78293	1.27165	0.287163	0.651323
Sutterella	0.835055	1.46444	0.426543	1.0854	0.420473	1.9819	0.817635	2.24306	3.36267	7.38768	2.64761	1.35138	1.98176	3.98173	0.151882	0.376514	0.676323	0.197337	0.514394	0.183765	0.661834
Clostridium	0.302449	0.312989	0.149224	0.156894	1.04618	0.247097	0.361537	4.12401	3.72767	1.71829	5.69379	1.20027	1.98338	2.98176	0	0	0.041848	0.01104	0.029387	0.009837	0
Mucispirillum	0.06049	0.014357	0.13866	0.149178	0.749593	0.003841	0.098376	0.288307	0.225284	0.736037	0.313158	0.462963	0.716374	0.615347	1.27581	3.5918	2.01682	1.79949	1.83764	1.93873	3.10938
[Prevotella]	0.126881	0.43359	0.227138	0.848773	0.379177	0.361043	0.76543	0.724241	0.61211	0.677318	0.573649	1.00845	1.00929	0.871623	0.90001	0.648568	0.198442	2.41082	2.18273	0.398273	0.282734
Dorea	0.081145	0.021536	0.035655	0.121743	0.153923	0	0	1.66124	2.27293	0.785197	0.508171	1.80899	1.89726	1.93846	0.131053	0.577398	0.278089	0.229076	0.384721	0.283745	0.218475
Shigella	0.138684	0.021536	0.155827	0.017147	0.126392	0.08834	0.098374	1.46846	1.43029	1.08562	0.434151	0.817687	0.983742	1.48736	0.579755	0.12053	0.086397	0.155937	0.198375	0.284761	0.098475
Parabacteroides	0.212452	0.140702	0.190162	0.422672	0.155175	0.21893	0.298476	0.415093	0.752694	0.357777	0.303194	0.541195	0.651743	0.582764	1.01891	0.228434	0.159294	0.638929	0.616354	0.837163	0.294874
Adlercreutzia	0.231632	0.508248	0.345989	0.207478	0.252784	0.47755	0.294847	0.447223	0.345785	0.398744	0.243409	0.314	0.487364	0.439485	0.432213	0.332893	0.26459	0.445732	0.398133	0.284714	0.18747
Paraprevotella	0.04131	0.021536	0.035655	0.222053	0.031285	0.072977	0.038471	0.480222	0.599885	0.736037	0.794283	0.577632	0.74623	0.571634	0.266445	0.199736	0.295638	0.275995	0.284761	0.198475	0.217465
Alistipes	0.008852	0.021536	0.025091	0.023148	0.016268	0.021765	0.0248746	0.736399	1.00941	0.400109	0.390025	1.26136	1.09485	0.462742	0.27252	0.150376	0.195742	0.092458	0.094827	0.38485	0.198475
