# Supplementary material for: Integrated gut microbiome and metabolome analysis reveals the inhibition effect of Lactobacillus plantarum CBT against colorectal cancer
Source: Royal Society of Chemistry journal article supplement (doi:10.1039/d3fo04806c), 2023-12-07
Supplement: d3fo04806c3.xlsx [file d3fo04806c3.xlsx]

## Sheet: 总体二级功能类群统计表
Level1	Level2	Abundance
Biosynthesis	Nucleoside and Nucleotide Biosynthesis	37567.1
Biosynthesis	Amino Acid Biosynthesis	35048.7
Biosynthesis	Cofactor, Prosthetic Group, Electron Carrier, and Vitamin Biosynthesis	23942.6
Biosynthesis	Fatty Acid and Lipid Biosynthesis	16993.8
Generation of Precursor Metabolite and Energy	Fermentation	13325.9
Biosynthesis	Carbohydrate Biosynthesis	13265.1
Biosynthesis	Cell Structure Biosynthesis	10789.1
Degradation/Utilization/Assimilation	Carbohydrate Degradation	9753.9
Degradation/Utilization/Assimilation	Carboxylate Degradation	8346.73
Degradation/Utilization/Assimilation	Nucleoside and Nucleotide Degradation	6610.49
Biosynthesis	Secondary Metabolite Biosynthesis	6481.44
Generation of Precursor Metabolite and Energy	Glycolysis	5360.71
Degradation/Utilization/Assimilation	Secondary Metabolite Degradation	4499.53
Degradation/Utilization/Assimilation	C1 Compound Utilization and Assimilation	3985.78
Degradation/Utilization/Assimilation	Polymeric Compound Degradation	3550.23
Generation of Precursor Metabolite and Energy	Pentose Phosphate Pathways	3137.13
Generation of Precursor Metabolite and Energy	TCA cycle	2899.07
Biosynthesis	Aromatic Compound Biosynthesis	2584.43
Generation of Precursor Metabolite and Energy	Photosynthesis	1840.39
Biosynthesis	Aminoacyl-tRNA Charging	1605.83
Metabolic Clusters	tRNA charging	1605.83
Glycan Pathways	Glycan Biosynthesis	1548.96
Glycan Pathways	Glycan Degradation	1504.87
Metabolic Clusters	superpathway of L-aspartate and L-asparagine biosynthesis	1451.55
Degradation/Utilization/Assimilation	Amine and Polyamine Degradation	1307.25
Metabolic Clusters	O-antigen building blocks biosynthesis (E. coli)	1259.2
Detoxification	Antibiotic Resistance	1221.15
Degradation/Utilization/Assimilation	Inorganic Nutrient Metabolism	1120.24
Macromolecule Modification	Nucleic Acid Processing	931.29
Degradation/Utilization/Assimilation	Amino Acid Degradation	921.8
Metabolic Clusters	L-glutamate and L-glutamine biosynthesis	899.35
Generation of Precursor Metabolite and Energy	superpathway of glycolysis and Entner-Doudoroff	868.72
Metabolic Clusters	pyrimidine deoxyribonucleotides de novo biosynthesis I	827.71
Biosynthesis	Amine and Polyamine Biosynthesis	781.73
Metabolic Clusters	pyrimidine deoxyribonucleotide phosphorylation	758.26
Generation of Precursor Metabolite and Energy	Respiration	577.36
Generation of Precursor Metabolite and Energy	Electron Transfer	443.7
Biosynthesis	Other Biosynthesis	426.67
Metabolic Clusters	pyrimidine deoxyribonucleotides de novo biosynthesis III	425.61
Degradation/Utilization/Assimilation	Alcohol Degradation	289.69
Generation of Precursor Metabolite and Energy	formaldehyde oxidation I	187.8
Generation of Precursor Metabolite and Energy	superpathway of glycolysis, pyruvate dehydrogenase, TCA, and glyoxylate bypass	159.94
Degradation/Utilization/Assimilation	Aromatic Compound Degradation	152.17
Metabolic Clusters	pyrimidine deoxyribonucleotides biosynthesis from CTP	110.17
Biosynthesis	Metabolic Regulator Biosynthesis	87.12
Metabolic Clusters	pyrimidine deoxyribonucleotides de novo biosynthesis IV	83.91
Generation of Precursor Metabolite and Energy	glyoxylate cycle	75.69
Degradation/Utilization/Assimilation	Fatty Acid and Lipid Degradation	70.87
Generation of Precursor Metabolite and Energy	isopropanol biosynthesis	21.59
Degradation/Utilization/Assimilation	Degradation/Utilization/Assimilation - Other	11.07
Generation of Precursor Metabolite and Energy	methylaspartate cycle	6.52
Degradation/Utilization/Assimilation	Aldehyde Degradation	6.45
Generation of Precursor Metabolite and Energy	ethylmalonyl-CoA pathway	3.29
Metabolic Clusters	phospholipases	1.27
Detoxification	methanol oxidation to carbon dioxide	0.85
Generation of Precursor Metabolite and Energy	methyl ketone biosynthesis	0.78
Degradation/Utilization/Assimilation	Chlorinated Compound Degradation	0.62
Macromolecule Modification	Protein Modification	0.08
Generation of Precursor Metabolite and Energy	1,5-anhydrofructose degradation	0.07
