# Supplementary material for: Integrated gut microbiome and metabolome analysis reveals the inhibition effect of Lactobacillus plantarum CBT against colorectal cancer
Source: Royal Society of Chemistry journal article supplement (doi:10.1039/d3fo04806c), 2023-12-07
Supplement: d3fo04806c4.xlsx [file d3fo04806c4.xlsx]

## Sheet: P_value_dm
	TGF-β	TNF-α	IL6	IL10
Lactobacillus	0.700094	0.51649	0.914163	0.0498672
Oscillospira	0.264586	0.797972	0.0999135	0.264586
Bacteroides	0.0357696	0.0245542	0.778723	0.380713
Allobaculum	0.932157	0.668231	0.778723	0.170471
Turicibacter	0.124977	0.224216	0.897063	0.000943062
Coprococcus	0.00722479	0.0199421	0.555414	0.0357696
Prevotella	0.575515	0.831214	0.778723	0.605901
Helicobacter	0.33174	0.545699	0.400109	0.51649
Bifidobacterium	0.111633	0.224216	0.648269	0.0769288
[Ruminococcus]	0.932157	0.406397	0.349297	0.35582
Sutterella	0.15439	0.15439	0.897063	0.0024954
Clostridium	0.109804	0.168397	0.931007	0.000294526
Mucispirillum	0.575515	0.605901	0.648269	0.264586
[Prevotella]	0.0580731	0.139227	0.601221	0.765008
Dorea	0.0424423	0.0424423	0.931294	0.205386
Shigella	0.0125199	0.00962792	0.795442	0.111633
Parabacteroides	0.0991858	0.111633	0.555414	0.700094
Adlercreutzia	0.18747	0.432845	0.496495	0.286105
Paraprevotella	0.00962792	0.0125199	0.664203	0.18747
Alistipes	0.000943062	0.00370478	0.829089	0.0991858
