# Supplementary material for: Integrated gut microbiome and metabolome analysis reveals the inhibition effect of Lactobacillus plantarum CBT against colorectal cancer
Source: Royal Society of Chemistry journal article supplement (doi:10.1039/d3fo04806c), 2023-12-07
Supplement: d3fo04806c5.xlsx [file d3fo04806c5.xlsx]

## Sheet: Sheet1
name	ID	mz	rt	ppm	formula	KEGG	M_Mean	M_Median	M_RSD	NC_Mean	NC_Median	NC_RSD	FC	log2FC	P.value	-log10(P.value)	FDR	VIP	posneg
Ethylmethylacetic acid	M102T970	102.128	970.4	1.55834	C5H10O2	C18319	1.27291e+08	1.10879e+08	40.18	5.47919e+07	4.06817e+07	50.25	2.32	1.22	0.00209199	2.68	0.0117492	1.34431	pos
2-Hydroxybutyric acid	M104T147	104.053	146.6	0.103138	C4H8O3	C05984	1.95208e+08	1.47726e+08	58.77	6.85261e+07	6.82865e+07	30.08	2.85	1.51	0.00132178	2.88	0.00855429	1.37023	pos
Benzaldehyde	M107T943	107.049	943.1	2.09249	C7H6O	C00261	4.99357e+07	4.20785e+07	66.32	5.27097e+06	5.27138e+06	4.15	9.47	3.24	0.00163871	2.79	0.00991928	1.56892	pos
Benzene-1,2,4-triol	M109T48	109.022	48.2	16.1982	C6H6O3	C02814	1.65337e+07	1.9326e+07	49.83	7.51918e+06	6.19909e+06	79.46	2.2	1.14	0.0369676	1.43	0.0903019	1.04907	pos
epsilon-Caprolactone	M114T63	114.07	62.8	14.9034	C6H10O2	C01880	5.70894e+06	6.12208e+06	35.1	2.73641e+06	1.36956e+06	108.51	2.09	1.06	0.0201414	1.7	0.0585168	1.09347	pos
Benzeneacetonitrile	M118T363	118.065	362.6	1.4907	C8H7N	C16074	1.16245e+08	1.1046e+08	24.04	4.58868e+07	4.18314e+07	40.63	2.53	1.34	0.000113952	3.94	0.00156781	1.5331	pos
L-2,4-diaminobutyric acid	M118T802_1	118.065	802.4	1.9243	C4H10N2O2	C03283	3.17464e+07	2.96898e+07	45.35	1.14463e+07	7.28631e+06	72.65	2.77	1.47	0.0025501	2.59	0.0135088	1.32868	pos
L-Threonine	M120T84_1	120.003	84.1	1.05822	C4H9NO3	C00188	2.42117e+07	2.44527e+07	44.93	8.07163e+06	8.77809e+06	34.76	3	1.58	0.000395716	3.4	0.00370147	1.50006	pos
2,6-Dimethylaniline	M122T346	122.097	345.5	1.43041	C8H11N	C11004	1.34916e+08	9.42087e+07	72.42	4.39056e+07	42387045	14.97	3.07	1.62	0.0116898	1.93	0.0397841	1.34679	pos
L-Histidinol	M124T884_2	124.086	883.9	23.6455	C6H11N3O	C00860	8.86187e+09	6.96051e+09	65.89	5.6747e+08	1.50848e+08	198.29	15.62	3.96	0.000105454	3.98	0.00148527	1.51033	pos
Maltol	M127T702	127.039	702.3	0.0403891	C6H6O3	C11918	6.24597e+07	6.32635e+07	42.73	3.09504e+07	3.25734e+07	42.49	2.02	1.01	0.0278702	1.55	0.0738361	1.09075	pos
(S)-Piperidine-2-carboxamide	M129T212	129.102	212.2	0.960479	C6H12N2O	C19809	5.57662e+07	5.84469e+07	46.4	8.80533e+06	8.69695e+06	5.93	6.33	2.66	0.00123321	2.91	0.00815307	1.53743	pos
4-Guanidinobutanoic acid	M146T101_1	146.092	101.2	0.0152439	C5H11N3O2	C01035	6.40495e+07	6.25046e+07	40.5	3.04012e+07	3.28115e+07	25.42	2.11	1.08	0.00484364	2.31	0.021332	1.22532	pos
Acetylcholine	M147T97_2	147.121	97.2	26.7207	C7H16NO2	C01996	2.46388e+08	2.2287e+08	37.33	2.7614e+07	2.65219e+07	54.45	8.92	3.16	1.03269e-06	5.99	6.75183e-05	1.70752	pos
p-Hydroxyphenylacetic acid	M153T55	153.055	55.2	0.156807	C8H8O3	C00642	10589341	1.07543e+07	40.85	2.48125e+06	2.18402e+06	41.53	4.27	2.09	3.47654e-05	4.46	0.000697479	1.59266	pos
Phosphoglycolic acid	M157T974	156.991	974	7.15966	C2H5O6P	C00988	1.71541e+08	1.41857e+08	37.42	2.92294e+07	2.29286e+07	55.37	5.87	2.55	1.00318e-06	6	6.61311e-05	1.67492	pos
N5-Methyl-L-glutamine	M161T98	161.092	97.6	0.47178	C6H12N2O3	C03153	1.18848e+08	1.08022e+08	63.55	3.66411e+07	3.0226e+07	48.8	3.24	1.7	0.0150528	1.82	0.0474863	1.16771	pos
Isoeugenol	M165T469	165.092	469.1	6.05723	C10H12O2	C10469	1.19136e+07	1.14517e+07	39.21	5.00948e+06	1.46362e+06	149.18	2.38	1.25	0.0244786	1.61	0.0673462	1.218	pos
Phenylpyruvic acid	M165T894	165.114	894.1	0.230776	C9H8O3	C00166	1.96587e+08	1.72207e+08	68.53	3.0854e+07	3.15465e+07	9.42	6.37	2.67	0.00344508	2.46	0.0167304	1.42628	pos
L-Methionine S-oxide	M166T91	166.053	91.2	0.746748	C5H11NO3S	C02989	2.49223e+08	2.49708e+08	32.23	8.14447e+07	6.58917e+07	31.42	3.06	1.61	2.13291e-05	4.67	0.000507476	1.61546	pos
N-Acetyl-L-glutamate 5-semialdehyde	M174T143_2	174.075	143.4	4.45782	C7H11NO4	C01250	2.8336e+08	1.89274e+08	99.47	6.6998e+07	6.75408e+07	32.84	4.23	2.08	0.0173233	1.76	0.0525725	1.17449	pos
L-Arginine	M175T84_2	175.119	84.2	0	C6H14N4O2	C00062	6.42851e+08	5.19027e+08	89.69	1.90127e+08	8.30352e+07	141.31	3.38	1.76	0.0380027	1.42	0.0920737	1.06974	pos
N-Acetylornithine	M175T94	175.107	93.5	1.0051	C7H14N2O3	C00437	1.09938e+08	8.74498e+07	67.96	2.52096e+07	9.26324e+06	104.93	4.36	2.12	0.0166551	1.78	0.0511155	1.19647	pos
D-Gulono-1,4-lactone	M179T975	178.991	975	2.34564	C6H10O6	C05410	2.27894e+07	1.78145e+07	68.57	1.03887e+07	6.04682e+06	84.88	2.19	1.13	0.028829	1.54	0.0756616	1.14924	pos
Choline sulfate	M184T135	184.06	134.8	13.5055	C5H13NO4S	C00919	8.54865e+06	9.05917e+06	28.55	3.69247e+06	2.93388e+06	72.31	2.32	1.21	0.00207562	2.68	0.0116881	1.32346	pos
N8-Acetylspermidine	M188T106	188.176	106.5	0.734909	C9H21N3O	C01029	5.38067e+07	3.81061e+07	87.1	6.37487e+06	1.55784e+06	129.96	8.44	3.08	0.00309055	2.51	0.0154363	1.30258	pos
N-Acetyl-b-glucosaminylamine	M203T101_2	203.102	100.7	16.4154	C8H16N2O5	C01239	2.55584e+08	2.82415e+08	61.29	1.11608e+07	9.58694e+06	52.9	22.9	4.52	5.67287e-06	5.25	0.000214256	1.61502	pos
L-Kynurenine	M209T307	209.092	306.9	0.114782	C10H12N2O3	C00328	3.23226e+07	2.8169e+07	84.63	7.18274e+06	5.99877e+06	55.29	4.5	2.17	0.00640648	2.19	0.0261087	1.1979	pos
gamma-Glutamylalanine	M219T101_1	219.097	100.6	1.36926	C7H11N2O5R	C03740	1.47485e+08	1.22725e+08	46.77	1.32488e+07	1.37258e+07	41.49	11.13	3.48	8.61746e-07	6.06	6.16462e-05	1.67322	pos
5-Hydroxy-L-tryptophan	M221T269	221.092	269.4	0.796048	C11H12N2O3	C00643	2.64825e+07	2.44929e+07	68.19	8.08103e+06	7.46066e+06	62.32	3.28	1.71	0.0145036	1.84	0.0463167	1.1583	pos
Hydroxykynurenine	M224T55	223.986	54.8	9.4519	C10H12N2O4	C02794	9.28851e+07	5.03214e+07	102.92	2.93455e+06	2.73246e+06	54.02	31.65	4.98	3.13408e-06	5.5	0.000144086	1.65372	pos
Cyprodinil	M225T458	225.123	457.8	15.9913	C14H15N3	C10914	8.64777e+06	6.70413e+06	51.31	1.88455e+06	983518	113.4	4.59	2.2	0.00037395	3.43	0.00356582	1.54408	pos
4-(Glutamylamino) butanoate	M233T222	233.113	221.6	0.53193	C9H16N2O5	C15767	4.24078e+07	3.39906e+07	64.54	1.46473e+07	1.4967e+07	35.94	2.9	1.53	0.0194707	1.71	0.057151	1.06829	pos
N2-Succinyl-L-ornithine	M233T270	233.111	269.9	11.4794	C9H16N2O5	C03415	4.10281e+07	3.95474e+07	44.76	5.6396e+06	6.07779e+06	36.06	7.27	2.86	8.3828e-06	5.08	0.00027432	1.60389	pos
Costunolide	M233T595	233.154	595.4	1.69038	C15H20O2	C09382	2.59732e+07	2.12633e+07	50.24	4.48478e+06	2.4443e+06	99.58	5.79	2.53	0.000178964	3.75	0.00213778	1.58352	pos
N-Methyl-(R,S)-tetrahydrobenzylisoquinoline	M238T346	238.163	345.9	15.6364	C17H19N	C05314	3.08311e+07	2.32691e+07	95.72	1.1891e+07	1.11371e+07	21.36	2.59	1.37	0.0332948	1.48	0.0838242	1.15316	pos
beta-Alanyl-L-arginine	M245T293	245.149	293.1	0.0224247	C9H19N5O3	C05340	2.30693e+08	2.00374e+08	82.68	5.3277e+07	4.60165e+07	56.61	4.33	2.11	0.0421088	1.38	0.0990579	1.00132	pos
L-N2-(2-Carboxyethyl)arginine	M246T201	246.128	201.2	21.1268	C9H18N4O4	C06655	5.64719e+07	3.73743e+07	104.17	1.05406e+07	1.04539e+07	33.46	5.36	2.42	0.0198791	1.7	0.05795	1.15564	pos
2'-Deoxyadenosine	M252T105	252.108	104.8	1.68873	C10H13N5O3	C00559	1.08224e+08	3.50453e+07	118.68	6.63514e+06	1.25583e+06	163.04	16.31	4.03	0.00310866	2.51	0.0154928	1.28519	pos
alpha-D-Glucosamine 1-phosphate	M260T98	260.053	97.9	0.676785	C6H14NO8P	C06156	1.82124e+08	1.64401e+08	44.3	7.86055e+07	7.87445e+07	27.27	2.32	1.21	0.00233324	2.63	0.0126973	1.35654	pos
Parthenin	M263T552	263.128	551.9	0.0610519	C15H18O4	C09523	6.21046e+07	2.26172e+07	166.49	1.30015e+07	7.92885e+06	103.74	4.78	2.26	0.0302721	1.52	0.0783992	1.04905	pos
(S)-Abscisic acid	M265T432	265.144	431.7	0.467671	C15H20O4	C06082	1.31873e+07	1.33748e+07	15.31	5.89149e+06	3.08684e+06	89.61	2.24	1.16	0.0194298	1.71	0.0570782	1.25802	pos
N2-Succinyl-L-arginine	M275T423	275.139	423.4	13.8986	C10H18N4O5	C03296	3.6378e+07	4.01701e+07	40.23	1.69178e+07	1.16166e+06	167.03	2.15	1.1	0.0226929	1.64	0.0637807	1.22575	pos
N-Acetylmuramate	M276T253	276.108	252.9	14.2481	C11H19NO8	C02713	4.68671e+08	4.36493e+08	50.3	7.26798e+07	7.30871e+07	46.61	6.45	2.69	3.76896e-05	4.42	0.000738651	1.59134	pos
(5-L-Glutamyl)-L-glutamate	M277T144	277.103	143.8	0.0866104	C10H16N2O7	C05282	2.29741e+07	2.26672e+07	57.93	3.35295e+06	2.64018e+06	56.08	6.85	2.78	1.6973e-05	4.77	0.000436023	1.60165	pos
13(S)-HOT	M277T795	277.217	795.5	1.47286	C18H30O3	C16316	1.00257e+08	4.40119e+07	105.6	6.18785e+06	3.86396e+06	142.65	16.2	4.02	0.00205476	2.69	0.0115972	1.40359	pos
Cyclopeptine	M281T301	281.113	300.6	0.0234489	C17H16N2O2	C20579	1.33078e+07	1.13676e+07	55.17	4.19968e+06	4.25857e+06	26.49	3.17	1.66	0.000568242	3.25	0.00477743	1.45112	pos
1-Methyladenosine	M282T150	282.119	149.7	3.28168	C11H15N5O4	C02494	2.9657e+07	2.59027e+07	36.88	6.83213e+06	6.77183e+06	40.52	4.34	2.12	0.000132582	3.88	0.00173259	1.50825	pos
N7-Methylguanosine	M298T289	298.115	289.1	1.67721	C11H16N5O5	C20674	1.95585e+07	1.44834e+07	61.8	5.24449e+06	3.07137e+06	82.29	3.73	1.9	0.0019357	2.71	0.0111165	1.35687	pos
Nopaline	M305T144	305.147	144.2	5.64976	C11H20N4O6	C01682	1.1541e+07	8.82486e+06	63.95	2.71267e+06	2.98831e+06	35.97	4.25	2.09	0.00041756	3.38	0.00384049	1.43609	pos
Moupinamide	M314T574	314.138	574.4	1.83359	C18H19NO4	C02717	2.32057e+06	2.09914e+06	77.6	387676	182291	118.69	5.99	2.58	0.00131114	2.88	0.00850017	1.48884	pos
Kyotorphin	M320T303	320.166	302.8	4.89119	C15H23N5O4	C02993	1.08898e+07	1.07192e+07	47.79	3.8962e+06	3.00099e+06	49.17	2.79	1.48	0.00729311	2.14	0.0286428	1.20728	pos
Salutaridinol	M330T119	330.138	119.4	3.71458	C19H23NO4	C05220	3.20845e+07	3.40069e+07	31.08	1.0182e+07	5.44494e+06	94.83	3.15	1.66	0.000945274	3.02	0.00681426	1.4785	pos
9,12,13-TriHOME	M330T734	330.245	734.4	13.0208	C18H34O5	C14833	6.53192e+07	5.81198e+07	86.47	4.27415e+06	4.68403e+06	41.75	15.28	3.93	0.000128856	3.89	0.0017031	1.5548	pos
Senecionine	M336T450	336.191	450.3	0.0239908	C18H25NO5	C06176	2.05362e+07	1.53938e+07	56.06	3.37568e+06	2.24188e+06	62.81	6.08	2.6	3.4258e-05	4.47	0.000690483	1.58376	pos
Erucic acid	M338T755	338.342	754.5	4.05001	C22H42O2	C08316	4.67966e+07	4.53489e+07	33.66	2.25574e+07	1.85166e+07	49.35	2.07	1.05	0.00413112	2.38	0.0190539	1.20577	pos
Bufadienolide	M355T617	355.263	616.7	0.213926	C24H34O2	C16921	7.31674e+07	7.50434e+07	44.06	1.20288e+07	1.19518e+07	86.54	6.08	2.6	0.00275176	2.56	0.0142113	1.30788	pos
Nitrendipine	M361T514	361.139	514	0.000894403	C18H20N2O6	C07713	2.06518e+07	1.70004e+07	82.9	9.6584e+06	767734	176.91	2.14	1.1	0.048488	1.31	0.109854	1.06896	pos
1-Arachidonoylglycerol	M361T710	361.284	709.6	27.4318	C23H38O4	C13857	1.68032e+07	1.58699e+07	54.03	4.29566e+06	2.73765e+06	76.6	3.91	1.97	0.000759796	3.12	0.00584146	1.41836	pos
Lathosterol	M369T962	369.351	961.9	0.448544	C27H46O	C01189	2.54042e+07	1.27624e+07	99.35	5.7569e+06	2.4363e+06	153.27	4.41	2.14	0.00326069	2.49	0.0160451	1.27785	pos
6-Keto-prostaglandin F1a	M371T661	371.259	661	3.83493	C20H34O6	C05961	1.91473e+08	1.88295e+08	47.51	1.18313e+07	6.52768e+06	98.79	16.18	4.02	1.3562e-05	4.87	0.000372382	1.64119	pos
Riboflavin	M377T410	377.145	409.7	0.0666702	C17H20N4O6	C00255	5.28348e+08	3.33741e+08	78.25	3.08043e+07	3.23736e+07	34.88	17.15	4.1	5.90119e-07	6.23	4.77876e-05	1.68426	pos
Gein	M385T719	385.237	718.6	1.90923	C24H32O4	C17058	1.15412e+07	4.16511e+06	96.75	665572	453064	109.26	17.34	4.12	0.0122681	1.91	0.0411034	1.21249	pos
Betamethasone	M392T673	392.209	673.4	24.4767	C22H29FO5	C06848	1.21074e+07	9.06133e+06	82.88	1.83548e+06	1.58892e+06	44.32	6.6	2.72	0.000185227	3.73	0.00218964	1.49147	pos
Liquiritin	M401T280	401.13	280.4	26.2608	C21H22O9	C16989	1.43277e+07	7.74276e+06	98.24	125640	59050	151.79	114.04	6.83	0.000324171	3.49	0.00322413	1.45661	pos
Futalosine	M415T396	415.113	395.8	27.6447	C19H18N4O7	C16999	1.10627e+07	8.83147e+06	73.22	3.92871e+06	3.40194e+06	77.33	2.82	1.49	0.0164041	1.79	0.0505659	1.24173	pos
alpha-Tocopherol	M430T494	430.245	493.8	3.98188	C29H50O2	C02477	2.76515e+07	1.77574e+07	84.06	501060	27944.6	160.99	55.19	5.79	3.21779e-05	4.49	0.000661939	1.61902	pos
Dammarenediol II	M445T902_1	445.366	901.9	1.32744	C30H52O2	C19829	1.02684e+08	1.13963e+08	44.67	1.38003e+07	8.21509e+06	87.99	7.44	2.9	0.000163662	3.79	0.0020053	1.52019	pos
3-Dehydroecdysone	M462T618_1	462.267	618.2	1.00075	C27H42O6	C02513	3.20015e+07	2.64783e+07	78.84	7.89731e+06	284003	193.67	4.05	2.02	0.0160364	1.79	0.049736	1.14618	pos
T2 Toxin	M467T548	467.24	548.3	27.2322	C24H34O9	C09738	8.51035e+06	8.13506e+06	68.33	424733	96744.6	205.04	20.04	4.32	1.89065e-05	4.72	0.000465961	1.67028	pos
Retinoyl b-glucuronide	M476T762	476.274	761.6	1.96192	C26H36O8	C11061	4.26215e+07	2.43964e+07	110.23	6.01063e+06	2.66516e+06	104.6	7.09	2.83	0.00355408	2.45	0.0171116	1.29579	pos
Taurohyocholate	M516T548_1	516.296	547.6	4.9386	C26H45NO7S	C15516	1.26001e+08	1.23359e+08	55.23	1.53589e+07	1.25442e+07	40.64	8.2	3.04	5.98619e-06	5.22	0.000220669	1.62253	pos
D-Pantethine	M555T433	555.249	433.3	4.99956	C22H42N4O8S2	C12661	2.07829e+06	2.40618e+06	57.35	283342	65998.1	190.97	7.33	2.87	0.000908632	3.04	0.00662345	1.49491	pos
Protoporphyrin IX	M563T935_1	563.262	935.2	5.46104	C34H34N4O4	C02191	8.40843e+07	3.71135e+07	101.67	1.04463e+06	983421	31.5	80.49	6.33	0.000277746	3.56	0.00288281	1.60099	pos
Schaftoside	M565T421_2	565.152	420.9	4.91195	C26H28O14	C10181	7.66039e+07	7.23861e+07	88.1	3.22714e+07	216366	252.33	2.37	1.25	0.0102126	1.99	0.0362129	1.33632	pos
Bilirubin	M584T886	584.262	886.3	2.05387	C33H36N4O6	C00486	7.47859e+07	6.59315e+07	66.8	1.08786e+07	8.11367e+06	69.82	6.87	2.78	0.0030367	2.52	0.0152701	1.40027	pos
Mesobilirubinogen	M592T555_2	592.319	555	11.4803	C33H44N4O6	C05790	2.00095e+08	2.17025e+08	59.05	2.00813e+07	1.90744e+06	170.33	9.96	3.32	0.000843075	3.07	0.00626436	1.43899	pos
Calenduloside E	M633T535_1	633.396	535.5	5.01421	C36H56O9	C08964	5.19273e+06	3.76935e+06	80.68	2.06592e+06	306412	170.65	2.51	1.33	0.0288914	1.54	0.0757506	1.0653	pos
L-Serine	M104T84	104.035	83.9	0.730521	C3H7NO3	C00065	5.90908e+07	4.44554e+07	51.98	1.40077e+07	1.32355e+07	31.2	4.22	2.08	2.79741e-05	4.55	0.000820044	1.59185	neg
Benzoate	M122T461	122.033	461.2	27.6927	C7H6O2	C00180	4.41048e+07	4.85447e+07	62.23	4.36519e+06	2.19591e+06	167.93	10.1	3.34	0.00270282	2.57	0.0151041	1.39823	neg
6-Hydroxyhexanoic acid	M131T214	131.071	214.5	1.709	C6H12O3	C06103	4.36025e+08	4.26635e+08	32.63	1.574e+08	1.25123e+08	61.39	2.77	1.47	0.000927057	3.03	0.00744681	1.42826	neg
Gentisic acid	M153T186	153.019	185.5	1.15018	C7H6O4	C00628	5.06241e+07	5.07611e+07	26.23	2.34174e+07	2.66731e+07	65.23	2.16	1.11	0.0253738	1.6	0.0688436	1.18017	neg
myo-Inositol	M161T73	161.044	72.5	4.40872	C6H12O6	C00137	1.0918e+08	1.16904e+08	38.71	5.44527e+07	3.21184e+07	70.33	2.01	1	0.026478	1.58	0.070932	1.0674	neg
Quinolinic acid	M166T92	166.018	92.5	20.9375	C7H5NO4	C03722	4.03691e+07	3.40232e+07	35.58	1.71317e+07	7.01712e+06	157.75	2.36	1.24	0.0137319	1.86	0.045099	1.24817	neg
Hydantoin-5-propionic acid	M171T79	171.041	79.3	1.02899	C6H8N2O4	C05565	3.96843e+07	3.88243e+07	45.9	1.54957e+07	1.20298e+07	77.28	2.56	1.36	0.00651827	2.19	0.0273308	1.26296	neg
Citrulline	M175T289	175.098	289.2	11.4222	C6H13N3O3	C00327	1.31766e+07	1.19857e+07	42.46	4.63153e+06	3.91929e+06	46.37	2.84	1.51	0.000913038	3.04	0.00739105	1.38396	neg
Mannitol	M181T339	181.006	339.4	0.684784	C6H14O6	C00392	4.26215e+06	4.7351e+06	57.38	1.49799e+06	552303	121.48	2.85	1.51	0.0152169	1.82	0.0482952	1.23961	neg
Sorbitol	M181T88_1	180.973	88.4	0.620964	C6H14O6	C00794	6.92603e+08	6.75135e+08	33.89	1.98457e+08	2.10145e+08	50.98	3.49	1.8	0.0275418	1.56	0.072775	1.16003	neg
Ecgonine	M184T318_2	184.098	317.9	0.412824	C9H15NO3	C10858	1.51947e+07	1.62596e+07	75.57	2.5433e+06	671883	165.15	5.97	2.58	0.00481031	2.32	0.0221409	1.31664	neg
Quinate	M191T79	191.056	78.6	0.397789	C7H12O6	C00296	1.67885e+08	1.45923e+08	86.03	2.55056e+07	2.3517e+07	57.12	6.58	2.72	0.0130527	1.88	0.0435692	1.16487	neg
Glucaric acid	M191T80_1	191.02	80.2	3.61219	C6H10O8	C00818	9.04973e+07	8.5681e+07	41.32	4.50071e+07	4.52425e+07	41.83	2.01	1.01	0.0350294	1.46	0.086533	1.00516	neg
trans-Ferulic acid	M193T272	193.052	272.2	9.19957	C10H10O4	C01494	1.54546e+07	4.33645e+06	124.83	5.34187e+06	343106	209.65	2.89	1.53	0.0488587	1.31	0.109673	1.06235	neg
Salicyluric acid	M194T176	194.049	175.5	17.913	C9H9NO4	C07588	7.96073e+07	7.63573e+07	62.96	3.47066e+07	2.48291e+07	82.92	2.29	1.2	0.0421051	1.38	0.0984723	1.07292	neg
5-Keto-D-gluconate	M194T386	194.046	386.4	18.0373	C6H10O7	C01062	2.61883e+06	2.48153e+06	46.49	863727	683043	62.87	3.03	1.6	0.00147525	2.83	0.0100641	1.47027	neg
Anserine	M239T136	239.115	135.5	1.99067	C10H16N4O3	C01262	2.90401e+06	2.57093e+06	68.47	991438	223647	155.59	2.93	1.55	0.0208142	1.68	0.0599544	1.13885	neg
gamma-Glutamylcysteine	M249T88_2	248.96	87.9	0.00696255	C8H14N2O5S	C00669	1.81809e+09	1.19718e+09	73.43	175223370	1.52474e+08	45.31	10.38	3.38	5.57918e-05	4.25	0.0012257	1.55048	neg
Formononetin	M267T697	267.066	696.5	0.0562949	C16H12O4	C00858	1.18912e+07	8.97706e+06	87.15	2.08916e+06	2.03513e+06	43.96	5.69	2.51	0.00422639	2.37	0.0203426	1.25549	neg
[8]-Shogaol	M275T723	275.169	722.6	13.4463	C17H24O3	C10494	1.91067e+07	1.63766e+07	64.49	5.24655e+06	4.89698e+06	46.81	3.64	1.86	0.00342897	2.46	0.0176773	1.28416	neg
(6Z)-Octadecenoic acid	M281T31	281.248	31.5	0.457399	C18H34O2	C08363	2.16627e+07	1.89486e+07	35.92	7.18724e+06	5.51345e+06	66.23	3.01	1.59	0.000536695	3.27	0.00520777	1.4728	neg
(2'E,4'Z,8E)-Colneleic acid	M293T820	293.212	819.6	0.763952	C18H30O3	C19827	1.88123e+08	1.53885e+08	66.23	4.24582e+07	4.23221e+07	77.81	4.43	2.15	0.00823318	2.08	0.0320373	1.24835	neg
9,10-Epoxyoctadecenoic acid	M295T842	295.228	841.7	0.420015	C18H32O3	C14825	4.59599e+08	5.25593e+08	44.12	1.33252e+08	8.41612e+07	87.66	3.45	1.79	0.00442979	2.35	0.0209304	1.32585	neg
11Z-Eicosenoic acid	M310T881	310.284	881.2	11.9246	C20H38O2	C16526	9.85839e+07	7.71686e+07	48	1.6045e+07	1.5789e+07	16	6.14	2.62	1.52702e-07	6.82	5.09421e-05	1.75047	neg
Docosapentaenoic acid (22n-3)	M329T934	329.248	933.9	2.42978	C22H34O2	C16513	6.13255e+08	7.30135e+08	50.19	1.50864e+08	1.72858e+08	76.44	4.06	2.02	0.0293834	1.53	0.0761628	1.06122	neg
Secoisolariciresinol	M362T540	362.164	540.3	24.2984	C20H26O6	C18167	7.03397e+06	5.76588e+06	85.23	2.89951e+06	37573.1	191.76	2.43	1.28	0.0234293	1.63	0.0652138	1.08667	neg
S-Adenosylmethionine	M397T757	397.226	757.3	1.82423	C15H22N6O5S	C00019	1.39424e+08	1.18821e+08	75.37	1.52574e+07	1.07904e+07	86.47	9.14	3.19	0.000300125	3.52	0.00357944	1.43667	neg
Folic acid	M441T761_1	441.253	760.8	0.193873	C19H19N7O6	C00504	1.42563e+08	1.59217e+08	66.45	1.78549e+07	1.63849e+07	47.44	7.98	3	0.0144662	1.84	0.046752	1.21214	neg
Glycochenodeoxycholic acid	M448T619	448.306	618.6	2.06109	C26H43NO5	C05466	6.75349e+06	6.14086e+06	76.66	829478	564827	68.25	8.14	3.03	0.0015102	2.82	0.010191	1.33263	neg
Biliverdin	M581T611	581.239	611.1	0.510594	C33H34N4O6	C00500	3.77197e+06	2.76599e+06	78.71	173838	144381	64.11	21.7	4.44	0.00186113	2.73	0.0116872	1.40694	neg
Soyasaponin I	M942T592_1	941.51	591.9	2.14974	C48H78O18	C08983	5.86444e+07	4.83825e+07	65.88	1.75958e+07	2.43999e+06	219.05	3.33	1.74	0.00414857	2.38	0.0200782	1.37806	neg
2-Phenylethanol	M105T346	105.07	345.5	1.90349	C8H10O	C05853	8.44071e+06	8.37471e+06	9.52	7.84189e+07	8.65568e+07	74.5	0.11	-3.22	0.00464918	2.33	0.0207261	1.44338	pos
L-Homoserine	M120T84_2	120.102	84.1	2.65298	C4H9NO3	C00263	4.60936e+07	4.96997e+07	59.27	1.39334e+08	1.04541e+08	72.96	0.33	-1.6	0.00539849	2.27	0.022989	1.25058	pos
(S)-1-Phenylethanol	M122T107	122.071	106.9	18.8415	C8H10O	C11348	9217686	2.87591e+06	185.66	6.78986e+07	2.26704e+07	142.93	0.14	-2.88	0.00439052	2.36	0.0198785	1.34945	pos
2,4-Xylidine	M122T364	122.096	363.6	1.44148	C8H11N	C11003	1.06421e+07	8.84809e+06	64.06	4.35723e+07	4.55003e+07	45.86	0.24	-2.03	0.00120304	2.92	0.00802348	1.45559	pos
N-Carbamoylputrescine	M132T90	132.113	90.2	1.33219	C5H13N3O	C00436	4.33479e+07	4.11506e+07	40.45	9.89241e+07	9.36446e+07	29.02	0.44	-1.19	0.00107902	2.97	0.0074372	1.45039	pos
Perillyl alcohol	M135T736	135.117	735.9	0.0277691	C10H16O	C02452	3.38336e+06	3.33774e+06	16.93	2.73943e+07	2.41444e+07	52.64	0.12	-3.02	0.000146873	3.83	0.00185086	1.64958	pos
Dopamine	M136T203	136.076	203.5	29.6453	C8H11NO2	C03758	4.5045e+08	3.60059e+08	65.2	2.41943e+09	2.41634e+09	53.29	0.19	-2.43	0.000998408	3	0.00704643	1.47229	pos
Acetylphosphate	M140T688	139.988	687.8	0.681092	C2H5O5P	C00227	1.13531e+07	1.05519e+07	16.15	6.47415e+07	70931605	30.17	0.18	-2.51	6.9728e-06	5.16	0.000241557	1.75269	pos
Carbamoyl phosphate	M142T965	141.983	964.9	0.248556	CH4NO5P	C00169	8.29511e+06	9.5207e+06	63.7	1.95861e+07	17892943	20.79	0.42	-1.24	0.00884992	2.05	0.0327722	1.26207	pos
4-Acetamidobutanoic acid	M146T267	146.081	267.4	0.848843	C6H11NO3	C02946	2.98993e+07	2.8054e+07	17.79	5.95077e+07	5.42601e+07	64.59	0.5	-0.99	0.0302086	1.52	0.0783232	1.12401	pos
L-Lysine	M147T524	147.112	523.6	3.23562	C6H14N2O2	C00047	830384	875657	13.47	4.77855e+07	3.24609e+07	75.5	0.02	-5.85	4.23269e-05	4.37	0.000797214	1.73614	pos
L-2-Hydroxyglutaric acid	M149T62	148.977	62.2	1.58093	C5H8O5	C03196	1.5204e+07	1.262e+07	44.03	5.10124e+07	3.55767e+07	69.67	0.3	-1.75	0.0206392	1.69	0.0596079	1.13999	pos
2,3-Butanediol	M155T283	154.99	282.8	1.15174	C4H10O2S2	C00265	5.88577e+07	7.21961e+07	51.14	1.65456e+08	1.87102e+08	33.51	0.36	-1.49	0.00173088	2.76	0.0102669	1.34817	pos
4-Acetamido-2-aminobutanoic acid	M160T380	160.097	379.7	1.91565	C6H12N2O3	C06442	7.38968e+06	7.26287e+06	49.97	3.19667e+07	3.64151e+07	43.22	0.23	-2.11	0.000583784	3.23	0.00485564	1.46852	pos
Glucosamine	M162T168	162.076	168	22.4216	C6H13NO5	C00329	2.56093e+07	2.52413e+07	13.91	2.78231e+08	2.78147e+08	61.14	0.09	-3.44	0.000278152	3.56	0.00288535	1.65319	pos
Enol-phenylpyruvate	M165T173	165.055	172.9	0.145406	C9H8O3	C02763	3.37639e+08	3.58398e+08	27.74	7.03173e+08	7.35114e+08	29.17	0.48	-1.06	0.00103689	2.98	0.00722497	1.42154	pos
Diaminopimelic acid	M173T101_1	173.091	100.9	19.2615	C7H14N2O4	C00666	1.13588e+08	1.22721e+08	29.99	4.41211e+08	4.09842e+08	35.76	0.26	-1.96	1.62461e-05	4.79	0.00042345	1.63244	pos
(2S,5S)-trans-Carboxymethylproline	M174T142_1	174.089	142.5	8.35948	C7H11NO4	C17366	257502	231728	25.69	2.62794e+07	2.99932e+07	46.54	0.01	-6.67	2.49166e-07	6.6	2.81911e-05	1.79013	pos
beta-Ionone	M175T736	175.148	735.9	23.0325	C13H20O	C12287	1.30275e+06	1.17221e+06	23.46	5.18603e+07	3.45652e+07	81.89	0.03	-5.32	0.000347606	3.46	0.00338433	1.65268	pos
N-Formyl-L-glutamic acid	M176T159	176.055	159.3	0.136321	C6H9NO5	C01045	83225.1	52570.9	94.92	1.31943e+06	1.38694e+06	39.08	0.06	-3.99	4.92028e-05	4.31	0.000875552	1.63952	pos
Gluconolactone	M178T145	178.052	145.2	26.3967	C6H10O6	C00198	1.24082e+06	788504	87.13	4.07943e+06	3.89024e+06	45.04	0.3	-1.72	0.0107583	1.97	0.0374537	1.29737	pos
Ecgonine methyl ester	M182T155	182.118	154.8	22.6996	C10H17NO3	C12448	1.77022e+06	880212	89.02	1.19987e+07	1.13417e+07	33.11	0.15	-2.76	1.3268e-05	4.88	0.000367367	1.66521	pos
Hydroxyphenyllactic acid	M183T173	183.085	173	28.9338	C9H10O4	C03672	1.35078e+08	9.88868e+07	62.06	4.28595e+08	3.99569e+08	57.22	0.32	-1.67	0.00729654	2.14	0.0286527	1.21679	pos
2',6'-Dihydroxy-4'-methoxyacetophenone	M183T385	183.065	385.4	0.341967	C9H10O4	C10680	1.2399e+07	1.06505e+07	39.82	4.57394e+07	4.87362e+07	29.36	0.27	-1.88	5.66989e-06	5.25	0.000214256	1.65749	pos
2,2'-Bisphenol F	M183T780	183.08	780	19.3034	C13H12O2	C14747	9.46379e+06	8.40402e+06	63.89	2.75243e+07	1.55485e+07	69.2	0.34	-1.54	0.0194602	1.71	0.0571254	1.16298	pos
Miglitol	M190T268	190.107	267.7	22.2716	C8H17NO5	C07708	5.32868e+07	5.9261e+07	54.37	1.59065e+08	175120699	30.43	0.34	-1.58	0.00199012	2.7	0.0113387	1.32573	pos
Dodecanoic acid	M201T989_1	200.972	988.9	0.952524	C12H24O2	C02679	9.85643e+06	9.65864e+06	16.12	2.23007e+07	2.05896e+07	16.91	0.44	-1.18	6.38475e-07	6.19	4.9812e-05	1.70595	pos
N6-(Delta2-Isopentenyl)-adenine	M204T315	204.123	314.6	0.817677	C10H13N5	C04083	9.73332e+06	3.87128e+06	93.79	6.74017e+07	7.04502e+07	61.2	0.14	-2.79	0.00124231	2.91	0.0081844	1.37681	pos
Jasmonic acid	M211T528	211.132	528	3.20179	C12H18O3	C08491	6.62926e+06	5.43127e+06	39.08	1.57312e+07	1.87367e+07	48.94	0.42	-1.25	0.0219962	1.66	0.0623722	1.15324	pos
N-Acetylserotonin	M219T414	219.113	414.4	0.439554	C12H14N2O2	C00978	3.63624e+06	3.14501e+06	53.72	1.49972e+07	1.61201e+07	31.05	0.24	-2.04	0.000250281	3.6	0.00267858	1.53903	pos
N-Acetyl-L-2-amino-6-oxopimelate	M231T146_1	231.097	146.4	0.00402029	C9H13NO6	C05539	3.11229e+07	4.09551e+07	63.71	1.2802e+08	1.11384e+08	53.27	0.24	-2.04	0.000606965	3.22	0.00500668	1.4755	pos
Dehydrocostus lactone	M231T601	231.142	600.7	17.4095	C15H18O2	C09387	1.81687e+06	1.61709e+06	41.25	6.68764e+06	5.70344e+06	49.23	0.27	-1.88	0.000476925	3.32	0.00423276	1.48295	pos
OPEO	M233T449	233.186	448.9	0.231232	C16H26O2	D05229	2.80337e+06	3.68118e+06	64.99	9.80144e+06	1.03498e+07	50.86	0.29	-1.81	0.0228066	1.64	0.0640496	1.09545	pos
Confertifolin	M235T717	235.169	716.9	0.0114763	C15H22O2	C09376	1.02104e+08	9.78267e+07	24.65	2.13327e+08	2.14012e+08	41.43	0.48	-1.06	0.00593538	2.23	0.024687	1.25088	pos
Procaine	M237T328	237.159	328	2.75714	C13H20N2O2	C07375	1.83873e+07	1.83135e+07	44.06	2.22824e+08	2.66503e+08	51.32	0.08	-3.6	1.56826e-05	4.8	0.000412033	1.67396	pos
N1-Acetylspermine	M245T76	245.233	75.7	0.0162208	C12H28N4O	C02567	1.95432e+07	2.01427e+07	36.47	5.29977e+07	6.12569e+07	41.4	0.37	-1.44	0.00130772	2.88	0.00848395	1.37636	pos
Gemfibrozil	M251T476	251.164	476.1	1.07724	C15H22O3	C07020	2.13677e+07	1.90979e+07	38.37	4.85743e+07	3.54427e+07	66.39	0.44	-1.18	0.0206974	1.68	0.0597352	1.10293	pos
(S)-Pinocembrin	M257T738	257.081	738	0.524598	C15H12O4	C09827	2.67573e+06	1.75475e+06	72.84	1.07625e+07	1.11669e+07	31.25	0.25	-2.01	0.000297324	3.53	0.00303081	1.5525	pos
Subaphylline	M264T400	264.142	400.5	18.5506	C14H20N2O3	C10497	5.23772e+06	5.62032e+06	47.54	1.64137e+08	1.72758e+08	42.11	0.03	-4.97	2.22146e-07	6.65	2.62511e-05	1.72012	pos
Norlinolenic acid	M264T426_2	264.206	425.5	10.5977	C17H28O2	C16344	1.91558e+06	1.813e+06	32.82	5.36309e+06	7.1198e+06	47.2	0.36	-1.49	0.00189332	2.72	0.0109554	1.36488	pos
(10S)-Juvenile hormone III diol	M267T589	267.195	588.6	14.7233	C16H28O4	C16505	4.38223e+06	2.90301e+06	53.76	1.60954e+07	1.76799e+07	26.29	0.27	-1.88	5.10565e-05	4.29	0.000899508	1.53345	pos
Adenosine	M268T102	268.104	101.9	1.11897	C10H13N5O4	C00212	1.37151e+07	1.75386e+07	56.28	4.3064e+07	4.70198e+07	55.74	0.32	-1.65	0.00930068	2.03	0.0339256	1.22406	pos
Geranylgeraniol	M273T711	273.253	711	2.07134	C20H34O	C09094	9.22824e+07	1.00049e+08	36.62	2.32508e+08	1.86769e+08	55.41	0.4	-1.33	0.00599247	2.22	0.024855	1.25901	pos
Phloretin	M275T637_1	275.091	636.8	0.639788	C15H14O5	C00774	1.73736e+07	1.85589e+07	50.22	3.86152e+07	4.04839e+07	33.99	0.45	-1.15	0.0228182	1.64	0.0640766	1.07836	pos
4-Hydroxycinnamoylagmatine	M276T229	276.144	229	1.43149	C14H20N4O2	C04498	1.89821e+07	1.96232e+07	18.1	3.61437e+08	4.12869e+08	52.45	0.05	-4.25	0.00034693	3.46	0.00338172	1.64804	pos
epsilon-(gamma-L-Glutamyl)-L-lysine	M276T342	276.155	342	0.637323	C11H21N3O5	C21730	8.03965e+06	8.9947e+06	50.9	2.18813e+07	2.1916e+07	42.79	0.37	-1.44	0.0160092	1.8	0.049665	1.11371	pos
Stearidonic acid	M277T749	277.216	749.4	0.995614	C18H28O2	C16300	1.28833e+07	1.28847e+07	22.69	3.10235e+07	3.20174e+07	48.74	0.42	-1.27	0.00532747	2.27	0.0227792	1.29416	pos
6-Paradol	M279T796	279.195	796.3	0.272211	C17H26O3	C10482	935018	1.1093e+06	42.61	8.00233e+06	9.50642e+06	48.02	0.12	-3.1	4.7343e-05	4.32	0.000854854	1.57058	pos
Linoleic acid	M281T753	281.247	752.8	3.47027	C18H32O2	C01595	1.73314e+07	1.78275e+07	28.38	3.56044e+07	3.27829e+07	31.79	0.49	-1.04	0.000665281	3.18	0.00532525	1.45972	pos
Stearolic acid	M281T788	281.247	788	1.69246	C18H32O2	C08459	1.2311e+07	6.59847e+06	115.33	5.98148e+07	6.43418e+07	61.17	0.21	-2.28	0.00346202	2.46	0.0167897	1.35193	pos
Qing Hau Sau	M283T561	283.154	561.2	1.3279	C15H22O5	C09538	3.71179e+06	2.27168e+06	87.39	1.45535e+07	1.52671e+07	49.17	0.26	-1.97	0.00285049	2.55	0.014561	1.37496	pos
(R,S)-Coclaurine	M285T488	285.169	487.7	26.3628	C17H19NO3	C06348	5.55924e+06	5.32106e+06	20.43	2.62658e+07	2.77748e+07	15.34	0.21	-2.24	2.2326e-09	8.65	2.25075e-06	1.78517	pos
N(6)-[(Indol-3-yl)acetyl]-L-lysine	M286T525	286.155	525	15.1459	C16H21N3O3	C04211	5.47162e+06	3.00102e+06	127.89	4.02242e+07	4.01594e+07	71.19	0.14	-2.88	0.0132271	1.88	0.04336	1.15299	pos
Kaempferol	M287T654	287.055	654	0.613123	C15H10O6	C05903	181750	122194	63.23	7.70842e+06	9.12992e+06	35.71	0.02	-5.41	8.70453e-09	8.06	4.47947e-06	1.78288	pos
Bz-Arg-OEt	M289T507	289.165	507.3	11.5299	C15H22N4O3	C01670	4.17267e+06	3.84847e+06	74.94	1.13532e+07	1.03236e+07	39.51	0.37	-1.44	0.00337514	2.47	0.0164751	1.31681	pos
Ophthalmate	M290T283	290.135	283.5	0.0827202	C11H19N3O6	C21016	12309840	1.41514e+07	76.94	3.73507e+07	36668228	8.94	0.33	-1.6	0.0166678	1.78	0.0511347	1.24631	pos
Indican	M295T81	294.938	81.1	1.84029	C14H17NO6	C08481	6.55807e+07	5.06504e+07	42.98	1.83214e+08	1.7724e+08	66.22	0.36	-1.48	0.015293	1.82	0.0480207	1.19487	pos
Phytanic acid	M295T820	295.299	820.1	11.9675	C20H40O2	C01607	1.5389e+06	1.44142e+06	51.77	4.64494e+06	4.25442e+06	28.35	0.33	-1.59	0.000308865	3.51	0.00311298	1.47884	pos
Exemestane	M297T394	297.18	394.1	16.0711	C20H24O2	C08162	2.60376e+07	2.88537e+07	32.71	6.75423e+07	7.46284e+07	35.57	0.39	-1.38	0.00156052	2.81	0.00959527	1.39375	pos
Alpha-dimorphecolic acid	M297T795_1	297.243	794.6	1.42644	C18H32O3	C14767	1.03458e+07	1.16946e+07	39.51	2.15673e+07	2.28836e+07	33.68	0.48	-1.06	0.00737856	2.13	0.0288978	1.24011	pos
Enterolactone	M299T515	299.127	515.2	0.0148588	C18H18O4	C18165	9.17151e+06	9.91289e+06	22.6	2.50983e+07	2.99535e+07	31.41	0.37	-1.45	8.86676e-05	4.05	0.00132007	1.58629	pos
18-Hydroxyoleate	M299T735	299.257	734.9	3.2614	C18H34O3	C19616	3.97057e+07	3.78984e+07	71.86	1.28985e+08	1.44053e+08	26.27	0.31	-1.7	0.00446123	2.35	0.0200875	1.42834	pos
cis-9,10-Epoxystearic acid	M299T753	299.257	753	2.28244	C18H34O3	C19418	1.85592e+07	2.04131e+07	30.26	4.34796e+07	4.84793e+07	33.28	0.43	-1.23	0.00262315	2.58	0.0137814	1.32298	pos
Adrenosterone	M300T604	300.18	603.6	24.9856	C19H24O3	C05285	3.3735e+06	2.97415e+06	85.45	9.23391e+06	1.04179e+07	55.89	0.37	-1.45	0.0412028	1.39	0.0976336	1.06841	pos
Sphingosine	M300T747_2	300.29	747.3	0.333012	C18H37NO2	C00319	2.07605e+09	1.68803e+09	49.71	6.13846e+09	5785066259	39.99	0.34	-1.56	0.000806667	3.09	0.00607447	1.44467	pos
3-Dehydrosphinganine	M300T765	300.29	764.6	0.333012	C18H37NO2	C02934	4.29052e+08	2.8654e+08	71.82	3.07753e+09	5.82007e+08	166.86	0.14	-2.84	0.0432689	1.36	0.101027	1.03065	pos
Arachidonic acid	M305T915	305.246	915.2	3.52502	C20H32O2	C00219	2.42419e+07	2.53934e+07	17.41	5.98797e+07	6.98906e+07	39.04	0.4	-1.3	0.0029533	2.53	0.0149355	1.44297	pos
Dicyclomine	M310T844	310.274	843.6	1.21183	C19H35NO2	C06951	4.47919e+07	4.02488e+07	57.88	2.11357e+08	2.33473e+08	55.96	0.21	-2.24	0.00500438	2.3	0.0217979	1.2957	pos
Levonorgestrel	M313T672	313.216	672.3	0.0766244	C21H28O2	C08153	2.42967e+07	2.20696e+07	33.7	8.74942e+07	8.03673e+07	72.43	0.28	-1.85	0.0155299	1.81	0.0486036	1.28064	pos
Prostaglandin J2	M317T856	317.199	856.2	26.3746	C20H30O4	C05957	1.44922e+07	1.87815e+07	56.65	4.27488e+07	2.96713e+07	59.05	0.34	-1.56	0.0066176	2.18	0.0267031	1.2579	pos
5-KETE	M318T689	318.227	688.6	23.5681	C20H30O3	C14732	5.30382e+06	6.07384e+06	37.92	1.38194e+07	1.24761e+07	37.15	0.38	-1.38	0.000625506	3.2	0.00509798	1.41051	pos
8,9-DiHETrE	M321T871	321.24	870.9	4.77525	C20H34O4	C14773	3.93209e+06	5.75537e+06	79.57	13688259	1.50898e+07	36.97	0.29	-1.8	0.0222616	1.65	0.0629055	1.13783	pos
(S)-Reticuline	M329T430	329.149	430.3	0.161104	C19H23NO4	C02105	497796	229729	127.55	2.88745e+06	2.77321e+06	24.32	0.17	-2.54	0.000359966	3.44	0.00346877	1.63757	pos
21-Deoxycortisol	M329T529	329.211	528.6	12.861	C21H30O4	C05497	2.13248e+06	2.14707e+06	28.79	1.42929e+07	1.94111e+07	73.4	0.15	-2.74	0.00837508	2.08	0.0315038	1.37791	pos
(S)-Norlaudanine	M330T141	330.14	141	0.084236	C19H23NO4	C21630	5.49356e+06	4.40205e+06	106.6	1.12509e+07	1.08021e+07	38.2	0.49	-1.03	0.0338351	1.47	0.0848631	1.10497	pos
Nicotinamide ribotide	M334T699	334.294	699	4.46285	C11H15N2O8P	C00455	6.54379e+06	4.57548e+06	55.21	3.71145e+07	4.37428e+07	41.86	0.18	-2.5	4.75983e-05	4.32	0.000858977	1.55757	pos
13,16,19-Docosatrienoic acid	M334T711	334.295	711.5	23.6324	C22H38O2	C16534	9.80316e+06	9.25852e+06	25.14	2.81009e+07	3.2993e+07	41.45	0.35	-1.52	0.000816089	3.09	0.00612662	1.48721	pos
Prostaglandin H2	M335T557	335.221	556.9	2.38648	C20H32O5	C00427	1.51371e+06	513421	136.93	1.98025e+07	1.86432e+07	62.97	0.08	-3.71	0.000537017	3.27	0.00459852	1.51546	pos
Bitertanol	M338T606	338.196	605.9	29.3439	C20H23N3O2	C11258	1.34884e+06	1.55607e+06	65.66	1.19003e+07	1.24371e+07	51.6	0.11	-3.14	6.66485e-05	4.18	0.00108933	1.5272	pos
11,12-DiHETrE	M339T635	339.253	634.8	0	C20H34O4	C14774	5.49044e+06	4.73498e+06	62.53	4.28025e+07	3.38025e+07	63.84	0.13	-2.96	1.82089e-05	4.74	0.0004571	1.63877	pos
Propafenone	M342T570	342.207	570.2	0.362354	C21H27NO3	C07381	2.8585e+06	2.03195e+06	79.87	1.1064e+07	1.411e+07	50.25	0.26	-1.95	0.00767981	2.11	0.0296846	1.18185	pos
11-Dehydrocorticosterone	M344T675	344.189	674.5	29.3435	C21H28O4	C05490	6.4732e+06	6.2821e+06	44.73	1.43645e+07	1.37756e+07	48.88	0.45	-1.15	0.0194548	1.71	0.05712	1.1729	pos
Quinestrol	M347T638	347.242	637.7	27.7443	C25H32O2	C07619	7.60738e+07	7.30891e+07	38.38	1.75951e+08	1.93083e+08	43.54	0.43	-1.21	0.00498562	2.3	0.0217459	1.35726	pos
Anandamide	M348T869	348.289	869.2	1.07956	C22H37NO2	C11695	3.05173e+07	2.98531e+07	36.86	1.48316e+08	1.24463e+08	36.99	0.21	-2.28	4.81823e-06	5.32	0.000192404	1.66726	pos
4-Chloroprogesterone	M349T514	349.2	513.8	21.8332	C21H29ClO2	C14676	985465	1.18642e+06	59.7	9.66153e+06	9.7747e+06	51.98	0.1	-3.29	7.35919e-05	4.13	0.00116933	1.63794	pos
Aldosterone	M360T751	360.31	750.6	1.76456	C21H28O5	C01780	5.08001e+07	5.50349e+07	24.13	1.38917e+08	1.66521e+08	34.38	0.37	-1.45	0.000237199	3.62	0.00259269	1.50105	pos
18-Hydroxycorticosterone	M363T580	363.216	580.3	2.41179	C21H30O5	C01124	1.31333e+06	767830	92.32	1.41446e+07	7.68246e+06	122.24	0.09	-3.43	0.0120439	1.92	0.0405735	1.21498	pos
6-Ketoprostaglandin E1	M369T564	369.224	563.5	7.24762	C20H32O6	C05962	1.0548e+06	1.09476e+06	16.25	1.70544e+07	1.76927e+07	41.76	0.06	-4.02	6.79906e-06	5.17	0.000238124	1.76383	pos
Prostaglandin G2	M369T638	369.225	637.5	6.70594	C20H32O6	C05956	2.57247e+06	1.38181e+06	89.53	1.72059e+07	1.95607e+07	50.15	0.15	-2.74	0.00091863	3.04	0.00667954	1.46026	pos
Campesterol	M383T825	383.368	824.7	0.260846	C28H48O	C01789	5.35685e+07	5.27831e+07	44.23	1.39731e+08	1.13217e+08	37.34	0.38	-1.38	0.0013757	2.86	0.00878562	1.36991	pos
10,11-Epoxy-3-geranylgeranylindole	M388T830	388.306	830.3	25.3261	C28H39NO	C20526	1.32439e+07	1.56704e+07	44.51	2.9513e+07	2.98361e+07	29.36	0.45	-1.16	0.0158236	1.8	0.0492361	1.09109	pos
alpha-Spinasterol	M395T790	395.365	789.5	4.38582	C29H48O	C08840	1.39622e+07	1.45592e+07	62.57	4.26006e+07	3.52786e+07	46.42	0.33	-1.61	0.00168008	2.77	0.0100651	1.29034	pos
Testosterone cypionate	M395T833	395.29	833	1.68484	C27H40O3	C08156	5.67256e+06	3.2999e+06	90.58	1.64985e+07	1.04834e+07	49.46	0.34	-1.54	0.00590364	2.23	0.0245935	1.20129	pos
Calcitriol	M399T668	399.325	667.9	3.50592	C27H44O3	C01673	1.94363e+07	1.60444e+07	58.6	1.55508e+08	1.07086e+08	63.19	0.12	-3	1.30073e-05	4.89	0.000365038	1.65031	pos
17a,20a-Dihydroxycholesterol	M401T674	401.337	674	0.662784	C27H46O3	C05499	3.10024e+07	3.23205e+07	32.33	8.72248e+07	9.52641e+07	48.87	0.36	-1.49	0.00172243	2.76	0.0102415	1.44405	pos
UCL 1608	M405T701_1	405.242	701	9.37703	C30H31N	C13788	1.08444e+07	7.21931e+06	74.16	3.46046e+07	4.20704e+07	59.89	0.31	-1.67	0.0301654	1.52	0.0782677	1.09407	pos
12alpha-Bromo-11beta-hydroxypregn-4-ene-3,20-dione	M408T437_1	408.133	436.9	7.10558	C21H29BrO3	C14669	1.45138e+06	1.22745e+06	59.4	7.42385e+06	7.73077e+06	32.97	0.2	-2.35	0.000168235	3.77	0.00204477	1.59083	pos
5-Dehydroavenasterol	M411T905	411.361	904.6	1.64332	C29H46O	C15783	1.11077e+07	1.05188e+07	65.27	3.99458e+07	4.371e+07	52.42	0.28	-1.85	0.0125464	1.9	0.0417943	1.20781	pos
6-Amino-6-deoxyfutalosine	M413T355	413.14	355.3	14.765	C19H19N5O6	C20773	5034252	4.04052e+06	60.14	2.12611e+07	2.58432e+07	61.76	0.24	-2.08	0.0207223	1.68	0.0597962	1.15192	pos
Yamogenin	M415T758	415.32	758.3	1.11898	C27H42O3	C08918	3.62834e+07	3.07344e+07	104.57	7.18135e+08	7.49823e+08	52.37	0.05	-4.31	0.000253624	3.6	0.00270253	1.50195	pos
Sodium deoxycholate	M415T780	415.21	779.9	1.87488	C24H39O4. Na	C11171	5.40333e+06	2.51347e+06	105.43	2.59073e+08	2.55881e+08	76.37	0.02	-5.58	0.000178913	3.75	0.00213778	1.49438	pos
Smilagenin	M416T777	416.337	776.8	18.9754	C27H44O3	C08913	3.96768e+06	3.73543e+06	38.05	8.93203e+06	9.35916e+06	41.22	0.44	-1.17	0.0182064	1.74	0.0545388	1.18214	pos
Daidzin	M417T435	417.117	434.6	1.38091	C21H20O9	C10216	6.20268e+06	4.22079e+06	64.31	1.49453e+07	1.44038e+07	42.44	0.42	-1.27	0.0061059	2.21	0.0252057	1.29643	pos
Taraxerol	M427T843	427.355	843.3	3.64686	C30H50O	C08637	3.11411e+08	1.92671e+08	61.49	8.3774e+08	8.27891e+08	31.92	0.37	-1.43	0.00171318	2.77	0.0102055	1.35877	pos
Hecogenin	M431T664	431.316	663.7	0.0164996	C27H42O4	C08902	5.55944e+07	5.73783e+07	14.08	2.30496e+08	2.27468e+08	55.87	0.24	-2.05	0.0030983	2.51	0.0154584	1.49665	pos
Cathasterone	M433T930	433.368	930.2	1.90139	C28H48O3	C15790	2.03335e+06	974247	84.48	8.45306e+06	8.98677e+06	46.12	0.24	-2.06	0.0111703	1.95	0.0385131	1.21003	pos
Maslinic acid	M473T813	473.362	813	1.47878	C30H48O4	C16939	4.78522e+06	3.96321e+06	30.35	5.08873e+07	5.22983e+07	35.56	0.09	-3.41	1.07461e-08	7.97	5.1114e-06	1.76619	pos
26-Hydroxyecdysone	M480T618_2	480.278	617.8	0.068269	C27H44O7	C16499	7.77424e+06	5.65079e+06	92.07	1.13789e+08	8.01582e+07	93.97	0.07	-3.87	0.00493844	2.31	0.0216021	1.28111	pos
Lithocholyltaurine	M484T523	484.303	523.5	13.5783	C26H45NO5S	C02592	1.54121e+07	1.52846e+07	82.86	9.15555e+07	9.29274e+07	24.76	0.17	-2.57	0.00164642	2.78	0.00993769	1.56663	pos
Mupirocin	M501T670	501.32	669.6	28.9236	C26H44O9	C11758	4.61723e+06	4.89826e+06	43.69	9.17453e+06	1.02202e+07	38.56	0.5	-0.99	0.0181132	1.74	0.0543414	1.16197	pos
beta-Carotene	M536T875	536.158	875.1	11.7845	C40H56	C02094	3.14385e+07	8.08864e+06	122.81	1.56998e+08	1.28563e+08	94.4	0.2	-2.32	0.0334896	1.48	0.0841819	1.15022	pos
Eschscholtzxanthin	M567T736	567.403	735.9	28.8605	C40H54O2	C08593	1.62054e+07	1.29093e+07	54.43	5.16612e+07	4.38715e+07	70.82	0.31	-1.67	0.0141861	1.85	0.0455998	1.19929	pos
C-Curarine	M596T825	596.341	825.3	17.2717	C40H44N4O	C09144	628181	238013	112.65	4.30697e+06	2.61139e+06	88.31	0.15	-2.78	0.00813889	2.09	0.0309032	1.24541	pos
Glyceric acid	M105T79	105.019	78.6	0.723676	C3H6O4	C00258	7.32339e+07	5.25562e+07	53.56	1.97951e+08	1.97828e+08	47.36	0.37	-1.43	0.0114806	1.94	0.0398451	1.25985	neg
o-Cresol	M107T186	107.05	186.4	0.709947	C7H8O	C01542	6.35169e+06	5.63666e+06	57.56	2.44661e+07	2.53413e+07	47.41	0.26	-1.95	0.0246785	1.61	0.0674672	1.10439	neg
Uracil	M112T102	112.023	102.3	10.7737	C4H4N2O2	C00106	7.10281e+06	6.47965e+06	47.08	1.86931e+07	1.92351e+07	51.52	0.38	-1.4	0.00759164	2.12	0.0302516	1.31061	neg
Creatinine	M113T109	112.986	108.9	12.3421	C4H7N3O	C00791	1.019e+08	1.1522e+08	74.59	4.23907e+08	4.31377e+08	45.52	0.24	-2.06	0.0227985	1.64	0.0639414	1.18194	neg
L-Malic acid	M134T71	134.018	70.6	8.67614	C4H6O5	C00149	3.86539e+06	3.54233e+06	72.6	4.39186e+07	3.97965e+07	80.83	0.09	-3.51	0.000244174	3.61	0.00315867	1.58223	neg
Phenyl acetate	M135T79_1	134.895	79	11.896	C8H8O2	C00548	1.55448e+07	1.40833e+07	74.94	1.83674e+08	1.50808e+08	84.5	0.08	-3.56	0.000322337	3.49	0.00373343	1.56787	neg
3,4-Dihydroxyphenylglycol	M151T157	151.041	157.3	7.2166	C8H10O4	C05576	4.30347e+06	4.01131e+06	24.55	2.06282e+07	2.6593e+07	68.49	0.21	-2.26	0.0180627	1.74	0.0545408	1.21288	neg
3-Hydroxyphenylacetic acid	M151T317	151.041	316.7	5.95865	C8H8O3	C05593	1.02256e+07	1.14038e+07	50.92	2.57237e+07	2.77325e+07	37.85	0.4	-1.33	0.00463457	2.33	0.0215455	1.29711	neg
Vanillin	M151T488	151.041	488.3	5.95865	C8H8O3	C00755	6.0812e+06	5.36255e+06	40.53	1.44374e+07	1.58627e+07	30.47	0.42	-1.25	0.00157599	2.8	0.0104886	1.39032	neg
Uric acid	M167T91_1	167.021	91.4	0.455032	C5H4N4O3	C00366	1.80045e+07	1.74825e+07	47.59	3.65788e+07	3.33719e+07	44.18	0.49	-1.02	0.0149317	1.83	0.0476647	1.13767	neg
cis-Aconitic acid	M173T72	173.009	72	0.439283	C6H6O6	C00417	2.23736e+06	2.77053e+06	72.01	5.25295e+06	5.2629e+06	17.71	0.43	-1.23	0.0199451	1.7	0.0582726	1.15303	neg
Gulonic acid	M195T92	195.051	92.5	0.123045	C6H12O7	C00800	2.54322e+08	2.06007e+08	29.71	1.45252e+09	1.14703e+09	62.99	0.18	-2.51	5.33187e-06	5.27	0.000299267	1.67019	neg
L-Idonate	M196T425	196.062	424.7	17.3418	C6H12O7	C00770	1.56801e+06	1.65234e+06	27.87	4.0893e+06	3.94562e+06	36.49	0.38	-1.38	8.04529e-05	4.09	0.00153061	1.60792	neg
Sinapoyl aldehyde	M208T573	208.078	572.5	19.224	C11H12O4	C05610	6.59982e+06	6.03536e+06	43.54	1.49937e+07	1.26651e+07	58.93	0.44	-1.18	0.0442768	1.35	0.102216	1.03178	neg
Sinapic acid	M223T308_1	223.061	308.4	0.340714	C11H12O5	C00482	9.00251e+06	9.24219e+06	33.46	2.59225e+07	2.62e+07	40.66	0.35	-1.53	0.00101433	2.99	0.00787717	1.43055	neg
Chorismate	M225T79	225.04	79.3	1.88411	C10H10O6	C00251	1.14413e+07	1.25584e+07	55.32	2.3639e+07	2.47482e+07	30.55	0.48	-1.05	0.00907368	2.04	0.033974	1.20707	neg
N-Acetyl-D-glucosaminate	M236T536	236.075	535.6	10.2678	C8H15NO7	C01133	1.78918e+06	1.77909e+06	59.42	4.5035e+06	4.22694e+06	41.94	0.4	-1.33	0.0381326	1.42	0.0920232	1.00958	neg
Biopterin	M237T260	237.092	260.2	22.776	C9H11N5O3	C06313	2.35846e+06	646808	120.08	8.28406e+06	6.01017e+06	63.45	0.28	-1.81	0.00749886	2.13	0.0299726	1.2654	neg
Thiopental	M241T309_2	241.109	308.7	28.933	C11H18N2O2S	C07521	3.07632e+06	1.21117e+06	151.82	1.07967e+07	1.26982e+07	63.84	0.28	-1.81	0.0125299	1.9	0.0424037	1.16724	neg
Pentadecanoic acid	M241T930	241.218	930.5	1.97332	C15H30O2	C16537	7.34976e+07	6.74849e+07	71.33	2.4187e+08	2.69018e+08	39.96	0.3	-1.72	0.00425234	2.37	0.0203971	1.30841	neg
Etomidate	M243T523	243.115	522.8	5.24854	C14H16N2O2	C07522	1.98763e+06	932774	124.43	5.37475e+06	4.65286e+06	42.5	0.37	-1.44	0.0128723	1.89	0.0431309	1.26214	neg
(2S)-Liquiritigenin	M255T565	255.07	564.9	14.8038	C15H12O4	C09762	2.31648e+08	2.69345e+08	40.69	6.09626e+08	572709049	33.04	0.38	-1.4	0.00268849	2.57	0.0150365	1.34914	neg
Genistein	M269T809	269.158	808.6	5.08239	C15H10O5	C06563	2.15587e+06	1.23358e+06	117.79	9.5933e+06	7.10155e+06	125.08	0.22	-2.15	0.0253258	1.6	0.0687605	1.06129	neg
17a-Estradiol	M271T785	271.228	784.8	1.40697	C18H24O2	C02537	1.17662e+08	7.73646e+07	74.11	2.35023e+08	2.35395e+08	11.85	0.5	-1	0.0228582	1.64	0.0640477	1.12774	neg
Saccharopine	M275T654	275.132	653.9	27.2596	C11H20N2O6	C00449	562656	206154	121.84	5.75741e+06	5.71579e+06	73.67	0.1	-3.36	0.00129047	2.89	0.00921366	1.37864	neg
Biochanin A	M284T414	284.06	414.4	14.157	C16H12O5	C00814	4.77767e+06	5.13785e+06	48.89	1.23132e+07	1.26179e+07	35.31	0.39	-1.37	0.0014623	2.83	0.0100191	1.38877	neg
Sakuranetin	M285T733	285.077	732.5	1.9379	C16H14O5	C09833	6.73401e+06	8.22386e+06	46.04	7.74601e+07	8.0454e+07	54.15	0.09	-3.52	8.07071e-06	5.09	0.000386969	1.67179	neg
Diosmetin	M299T654	299.056	654.5	0	C16H12O6	C10038	1.14075e+07	1.0471e+07	37.92	3.18349e+07	3.4547e+07	41.58	0.36	-1.48	0.0019629	2.71	0.0121139	1.35614	neg
Phenylbutazone	M307T629	307.146	629.2	2.85206	C19H20N2O2	C07440	189696	46754.7	112.86	1.47258e+06	1.01259e+06	69.02	0.13	-2.96	0.00177751	2.75	0.0113208	1.44212	neg
N-Acetyl-a-neuraminic acid	M308T80_2	308.099	79.5	1.54496	C11H19NO9	C19909	7.32327e+08	3.23305e+08	99.02	2.96393e+09	3.14381e+09	55.81	0.25	-2.02	0.0111681	1.95	0.0391272	1.22776	neg
12-Keto-tetrahydro-leukotriene B4	M335T696	335.224	695.8	2.01657	C20H32O4	C02165	4.28203e+06	4.06274e+06	62.05	9.21634e+06	8.87887e+06	31.18	0.46	-1.11	0.0363075	1.44	0.08874	1.01896	neg
Eupatilin	M343T368	343.085	367.8	8.95738	C18H16O7	C10040	792190	331093	102.06	4.62562e+06	5.0169e+06	56.25	0.17	-2.55	0.00277132	2.56	0.0153763	1.37728	neg
dGMP	M347T857	347.171	856.6	1.24749	C10H14N5O7P	C00362	2.07412e+06	1.89085e+06	59.07	6.83822e+06	6.68518e+06	21.36	0.3	-1.72	0.000874902	3.06	0.00719297	1.58075	neg
Lipoxin A4	M351T738	351.22	738.1	6.76499	C20H32O5	C06314	5.317e+07	4.07485e+07	94.52	1.93909e+08	2.09867e+08	40.11	0.27	-1.87	0.00212907	2.67	0.0128253	1.36373	neg
LysoPA(16_0_0_0)	M409T766	409.236	765.8	0.244358	C19H39O7P	C04036	1.08417e+07	1.14887e+07	38.17	2.35799e+07	1.9284e+07	52.77	0.46	-1.12	0.0254463	1.59	0.068969	1.1362	neg
Kaempferol 3-O-glucoside	M429T422	429.079	422.4	8.41338	C21H20O11	C12249	1.66139e+06	499455	157.74	2.47996e+07	2.61589e+07	40.36	0.07	-3.9	0.00114291	2.94	0.00852042	1.53345	neg
3,5-Diiodo-L-tyrosine	M433T843	433.101	843.4	3.79678	C9H9I2NO3	C01060	1.2744e+07	1.75601e+07	71.74	5.61428e+07	5.10159e+07	56.23	0.23	-2.14	0.00362836	2.44	0.0182791	1.32265	neg
FMN	M437T356	437.086	356	0.938031	C17H21N4O9P	C00061	908652	843816	48.53	3.06197e+06	3.51641e+06	58.06	0.3	-1.75	0.0180164	1.74	0.0544308	1.14597	neg
L-Ascorbic acid, 6-octadecanoate	M441T738	441.283	737.9	5.49307	C24H42O7	C20340	479302	345248	88.91	2.40839e+06	994564	97.56	0.2	-2.33	0.0116333	1.93	0.0402081	1.24413	neg
Cholesterol sulfate	M465T829_4	465.307	829.2	5.32122	C27H46O4S	C18043	5.31636e+10	4.00699e+10	76.43	1.63515e+11	2.16055e+11	50.7	0.33	-1.62	0.0251066	1.6	0.0682905	1.04955	neg
ATP	M507T885_1	507.121	885.4	0.932936	C10H16N5O13P3	C00002	1.55411e+07	1.1919e+07	82.26	3.82587e+07	4.03699e+07	45.65	0.41	-1.3	0.0270737	1.57	0.0719153	1.12226	neg
