# Supplementary material for: Integrated gut microbiome and metabolome analysis reveals the inhibition effect of Lactobacillus plantarum CBT against colorectal cancer
Source: Royal Society of Chemistry journal article supplement (doi:10.1039/d3fo04806c), 2023-12-07
Supplement: d3fo04806c6.xlsx [file d3fo04806c6.xlsx]

## Sheet: Sheet1
name	ID	mz	rt	ppm	formula	KEGG	LP_Mean	LP_Median	LP_RSD	M_Mean	M_Median	M_RSD	FC	log2FC	P.value	-log10(P.value)	FDR	VIP	posneg
Adrenoyl ethanolamide	M376T911_2	376.321	910.8	0.201955	C24H41NO2	C13829	3.93881e+06	2.61873e+06	65.81	37928963	3.17836e+07	46.76	0.1	-3.27	1.05606e-06	5.98	0.000906972	2.30462	pos
11Z-Eicosenoic acid	M310T881	310.284	881.2	11.9246	C20H38O2	C16526	3.64641e+07	3.51457e+07	26.09	9.85839e+07	7.71686e+07	48	0.37	-1.43	0.000229419	3.64	0.0305284	2.14143	neg
Hydantoin-5-propionic acid	M171T79	171.041	79.3	1.02899	C6H8N2O4	C05565	1.31715e+07	1.25121e+07	29.85	3.96843e+07	3.88243e+07	45.9	0.33	-1.59	0.000504819	3.3	0.0435631	2.0899	neg
1-Methyladenosine	M282T150	282.119	149.7	3.28168	C11H15N5O4	C02494	1.21135e+07	1.03819e+07	62.04	2.9657e+07	2.59027e+07	36.88	0.41	-1.29	0.00179121	2.75	0.0478548	1.85531	pos
Arachidonic acid	M305T915	305.246	915.2	3.52502	C20H32O2	C00219	3.81898e+06	5.23502e+06	78.85	2.42419e+07	2.53934e+07	17.41	0.16	-2.67	0.00208714	2.68	0.0521065	2.03001	pos
Fructose 1,6-bisphosphate	M340T399	340.213	398.9	8.74843	C6H14O12P2	C00354	851524	464263	96.5	3.97455e+06	5.11073e+06	54.18	0.21	-2.22	0.002261	2.65	0.0788435	1.90087	neg
Kyotorphin	M320T303	320.166	302.8	4.89119	C15H23N5O4	C02993	2.86669e+06	1.58359e+06	99.63	1.08898e+07	1.07192e+07	47.79	0.26	-1.93	0.00229825	2.64	0.0554118	1.82282	pos
Protoporphyrin IX	M563T935_1	563.262	935.2	5.46104	C34H34N4O4	C02191	5.39648e+06	3.51542e+06	100.24	8.40843e+07	3.71135e+07	101.67	0.06	-3.96	0.00302936	2.52	0.0650435	1.8173	pos
L-Kynurenine	M209T307	209.092	306.9	0.114782	C10H12N2O3	C00328	6.29935e+06	4196276	58.19	3.23226e+07	2.8169e+07	84.63	0.19	-2.36	0.00307777	2.51	0.0657731	1.82394	pos
Citrulline	M175T289	175.098	289.2	11.4222	C6H13N3O3	C00327	4.68313e+06	4.82095e+06	64.84	1.31766e+07	1.19857e+07	42.46	0.36	-1.49	0.00337724	2.47	0.0920581	1.85226	neg
Atorvastatin	M558T595_1	558.255	594.9	3.40346	C33H35FN2O5	C06834	1.14444e+07	6.16037e+06	78.49	3.33102e+07	3.4075e+07	50.22	0.34	-1.54	0.00385587	2.41	0.0960527	1.85653	neg
Ergosta-5,7,22,24(28)-tetraen-3beta-ol	M377T901	377.318	900.9	6.18576	C28H42O	C05440	1.72979e+06	1.29389e+06	70.83	5.58725e+06	5.51063e+06	24.05	0.31	-1.69	0.00391118	2.41	0.0737003	1.91434	pos
p-Hydroxyphenylacetic acid	M153T55	153.055	55.2	0.156807	C8H8O3	C00642	4566849	3.26375e+06	76.84	10589341	1.07543e+07	40.85	0.43	-1.21	0.005546	2.26	0.0884754	1.69921	pos
L-Threonine	M120T84_1	120.003	84.1	1.05822	C4H9NO3	C00188	1.14302e+07	1.14637e+07	31.58	2.42117e+07	2.44527e+07	44.93	0.47	-1.08	0.00571344	2.24	0.0897995	1.72544	pos
gamma-Glutamylcysteine	M249T88_2	248.96	87.9	0.00696255	C8H14N2O5S	C00669	4.88017e+08	2.78393e+08	89.36	1.81809e+09	1.19718e+09	73.43	0.27	-1.9	0.00655085	2.18	0.114531	1.77088	neg
Delta-Tocopherol	M402T936	402.348	936.2	4.47374	C27H46O2	C14151	1.95208e+06	1.11187e+06	84.63	6.11385e+06	4.04037e+06	65.28	0.32	-1.65	0.00767596	2.11	0.102725	1.69774	pos
N2-Succinyl-L-ornithine	M233T270	233.111	269.9	11.4794	C9H16N2O5	C03415	1.62718e+07	1.18438e+07	64.1	4.10281e+07	3.95474e+07	44.76	0.4	-1.33	0.00839656	2.08	0.107465	1.67076	pos
Guanine	M152T276_2	152.057	275.6	3.94588	C5H5N5O	C00242	3.75533e+08	3.47332e+08	87.1	1.30101e+09	1.03645e+09	76.68	0.29	-1.79	0.00852104	2.07	0.107967	1.66205	pos
Retinoyl b-glucuronide	M476T762	476.274	761.6	1.96192	C26H36O8	C11061	6.32757e+06	5.79077e+06	32.94	4.26215e+07	2.43964e+07	110.23	0.15	-2.75	0.0086897	2.06	0.109112	1.78433	pos
gamma-Glutamylalanine	M219T101_1	219.097	100.6	1.36926	C7H11N2O5R	C03740	5.72786e+07	4.43925e+07	76.87	1.47485e+08	1.22725e+08	46.77	0.39	-1.36	0.0107836	1.97	0.120978	1.61488	pos
Sorbitol	M181T88_1	180.973	88.4	0.620964	C6H14O6	C00794	3.36654e+08	3.55429e+08	60.6	6.92603e+08	6.75135e+08	33.89	0.49	-1.04	0.0113858	1.94	0.143449	1.68361	neg
5-Hydroxylysine	M145T85_2	145.097	84.9	28.4913	C6H14N2O3	C16741	1.38942e+07	9.74186e+06	59.36	3.39879e+07	3.40291e+07	48.58	0.41	-1.29	0.0115575	1.94	0.125139	1.6115	pos
1-Arachidonoylglycerol	M361T710	361.284	709.6	27.4318	C23H38O4	C13857	6.77216e+06	3.45998e+06	82.32	1.68032e+07	1.58699e+07	54.03	0.4	-1.31	0.0134812	1.87	0.134578	1.58228	pos
Riboflavin	M377T410	377.145	409.7	0.0666702	C17H20N4O6	C00255	1.89122e+08	5.16523e+07	129.91	5.28348e+08	3.33741e+08	78.25	0.36	-1.48	0.0168619	1.77	0.14907	1.55163	pos
Aldosterone	M360T751	360.31	750.6	1.76456	C21H28O5	C01780	2.24123e+07	1.62272e+07	75.34	5.08001e+07	5.50349e+07	24.13	0.44	-1.18	0.0176738	1.75	0.152365	1.60081	pos
Misoprostol	M351T436	351.253	436.2	0.128029	C21H36O5	C07227	1.81646e+06	740415	106.47	4.82941e+06	4.67407e+06	54.52	0.38	-1.41	0.0176952	1.75	0.152488	1.50597	pos
Gentisic acid	M153T186	153.019	185.5	1.15018	C7H6O4	C00628	1.92444e+07	1.22719e+07	104.26	5.06241e+07	5.07611e+07	26.23	0.38	-1.4	0.0177057	1.75	0.171756	1.70306	neg
Dammarenediol II	M445T902_1	445.366	901.9	1.32744	C30H52O2	C19829	3.41715e+07	3.97306e+07	83.51	1.02684e+08	1.13963e+08	44.67	0.33	-1.59	0.0184519	1.73	0.155542	1.51219	pos
4-Hydroxycinnamic acid	M163T221	163.042	220.8	9.66624	C9H8O3	C00811	7.25572e+06	5.34502e+06	57.52	1.48227e+07	1.62132e+07	34.82	0.49	-1.03	0.0188365	1.72	0.176558	1.59838	neg
6-Keto-prostaglandin F1a	M371T661	371.259	661	3.83493	C20H34O6	C05961	6.88889e+07	4.44193e+07	92.81	1.91473e+08	1.88295e+08	47.51	0.36	-1.47	0.0208009	1.68	0.163708	1.53555	pos
Isoflavone 7-O-beta-D-glucoside	M401T601	401.16	600.8	2.57315	C21H20O8	C04074	1.29996e+06	292851	152.51	1.94995e+07	1.06073e+07	128.5	0.07	-3.91	0.0209046	1.68	0.163805	1.52146	pos
(5-L-Glutamyl)-L-glutamate	M277T144	277.103	143.8	0.0866104	C10H16N2O7	C05282	1.04942e+07	7.0215e+06	78.88	2.29741e+07	2.26672e+07	57.93	0.46	-1.13	0.0209575	1.68	0.163908	1.52279	pos
L-Histidinol	M124T884_2	124.086	883.9	23.6455	C6H11N3O	C00860	2.7512e+09	8.95835e+08	144.13	8.86187e+09	6.96051e+09	65.89	0.31	-1.69	0.0231097	1.64	0.171633	1.50724	pos
11b-PGF2a	M335T813	335.217	812.8	14.3489	C20H34O5	C05959	3.17067e+06	2.87741e+06	46.24	6.91825e+06	7.97809e+06	51.78	0.46	-1.13	0.0240971	1.62	0.196374	1.52638	neg
alpha-Spinasterol	M395T790	395.365	789.5	4.38582	C29H48O	C08840	5.33763e+06	3.00901e+06	95.29	1.39622e+07	1.45592e+07	62.57	0.38	-1.39	0.0276616	1.56	0.185058	1.46679	pos
T2 Toxin	M467T548	467.24	548.3	27.2322	C24H34O9	C09738	3.50971e+06	859875	152.26	8.51035e+06	8.13506e+06	68.33	0.41	-1.28	0.0278146	1.56	0.185312	1.42274	pos
beta-Alanyl-L-lysine	M218T294	218.158	294	1.66094	C9H19N3O3	C05341	4.72262e+07	4.79211e+07	37.74	1.04321e+08	1.02985e+08	55.75	0.45	-1.14	0.033361	1.48	0.20233	1.42289	pos
Thiamine	M265T228	265.111	228.1	2.6404	C12H17N4OS	C00378	2.31449e+07	1.477e+07	96.61	8.22965e+07	7.55719e+07	69.39	0.28	-1.83	0.033643	1.47	0.203158	1.38843	pos
Chalconaringenin	M271T624_2	271.062	624	1.01822	C15H12O5	C06561	1.26682e+08	3.33918e+07	138.36	5.95564e+08	5.20204e+08	76.08	0.21	-2.23	0.0339085	1.47	0.225669	1.50075	neg
alpha-Tocopherol	M430T494	430.245	493.8	3.98188	C29H50O2	C02477	1.15809e+07	2.9701e+06	199.05	2.76515e+07	1.77574e+07	84.06	0.42	-1.26	0.039762	1.4	0.220583	1.4608	pos
Nopaline	M305T144	305.147	144.2	5.64976	C11H20N4O6	C01682	5.53733e+06	2.88311e+06	87.73	1.1541e+07	8.82486e+06	63.95	0.48	-1.06	0.0432115	1.36	0.227886	1.35009	pos
Bufadienolide	M355T617	355.263	616.7	0.213926	C24H34O2	C16921	2.8125e+07	2.28884e+07	84.14	7.31674e+07	7.50434e+07	44.06	0.38	-1.38	0.0432236	1.36	0.227911	1.35678	pos
Acetaminophen	M150T297	150.056	297.2	0.666417	C8H9NO2	C06804	2.72992e+07	2.31049e+07	38.73	5.46223e+06	5.45438e+06	27.95	5	2.32	2.7851e-06	5.56	0.00388046	2.36831	neg
Phytanic acid	M295T820	295.299	820.1	11.9675	C20H40O2	C01607	9.98769e+06	1.05332e+07	36.99	1.5389e+06	1.44142e+06	51.77	6.49	2.7	1.008e-05	5	0.00285259	2.24115	pos
5-Amino-2-oxopentanoic acid	M132T329	132.065	329.3	5.11867	C5H9NO3	C01110	4.44737e+07	4.40748e+07	33.27	1.38e+07	1.13942e+07	51.18	3.22	1.69	9.24872e-05	4.03	0.00865365	2.11625	pos
Arachidic acid	M311T892	311.296	892.2	0.538952	C20H40O2	C06425	2.17129e+08	2.07732e+08	27.87	8.27113e+07	8.39627e+07	45.66	2.63	1.39	0.000160004	3.8	0.0268066	2.15863	neg
Dihydrozeatin riboside	M353T315	353.164	315.3	15.5732	C15H23N5O5	C16447	3.98415e+06	3.38263e+06	45.98	1.27021e+06	1.28763e+06	40.72	3.14	1.65	0.000241013	3.62	0.0151672	2.06991	pos
Cortisone	M361T465	361.201	465.1	1.04097	C21H28O5	C00762	1.86541e+07	1.39558e+07	101.84	810005	541088	85.74	23.03	4.53	0.000440811	3.36	0.02109	2.00703	pos
cis-9,10-Epoxystearic acid	M299T753	299.257	753	2.28244	C18H34O3	C19418	1.42823e+08	1.28865e+08	68.3	1.85592e+07	2.04131e+07	30.26	7.7	2.94	0.000445443	3.35	0.0211686	1.98955	pos
1-Methyladenine	M150T144	150.077	144.2	1.17273	C6H7N5	C02216	2.24771e+07	2.04397e+07	83	1.87043e+06	1.87088e+06	14.35	12.02	3.59	0.00064153	3.19	0.0270382	2.16334	pos
Sildenafil	M474T709	474.215	709.1	21.5092	C22H30N6O4S	C07259	6.57312e+06	7.46333e+06	75.74	533644	420989	72.67	12.32	3.62	0.00076115	3.12	0.0506422	2.03577	neg
Sinapic acid	M223T308_1	223.061	308.4	0.340714	C11H12O5	C00482	2.80437e+07	2.35971e+07	60.47	9.00251e+06	9.24219e+06	33.46	3.12	1.64	0.000785246	3.1	0.0513423	2.0525	neg
Stearidonic acid	M277T749	277.216	749.4	0.995614	C18H28O2	C16300	2.97009e+07	2.83476e+07	39.72	1.28833e+07	1.28847e+07	22.69	2.31	1.2	0.00083349	3.08	0.0314935	1.93672	pos
Carbamoyl phosphate	M142T965	141.983	964.9	0.248556	CH4NO5P	C00169	4.77221e+07	3.3698e+07	72.73	8.29511e+06	9.5207e+06	63.7	5.75	2.52	0.00101113	3	0.0349444	1.93027	pos
6-Ketoprostaglandin E1	M369T564	369.224	563.5	7.24762	C20H32O6	C05962	5.52503e+06	5.3586e+06	57.57	1.0548e+06	1.09476e+06	16.25	5.24	2.39	0.00111046	2.95	0.0369098	2.08707	pos
L-Malic acid	M134T71	134.018	70.6	8.67614	C4H6O5	C00149	2.30523e+07	1.69148e+07	84.66	3.86539e+06	3.54233e+06	72.6	5.96	2.58	0.00111629	2.95	0.0612834	2.01054	neg
Phenyl acetate	M135T79_1	134.895	79	11.896	C8H8O2	C00548	9.61508e+07	7.00235e+07	87.31	1.55448e+07	1.40833e+07	74.94	6.19	2.63	0.00121842	2.91	0.0639901	2.00124	neg
Cellobiose	M341T92	341.11	92.2	1.56887	C12H22O11	C00185	2.63872e+08	2.41488e+08	38.21	8.81965e+07	8.82016e+07	54.37	2.99	1.58	0.00133994	2.87	0.0659302	1.96748	neg
3-Dehydro-2-deoxyecdysone	M429T635	429.302	635.1	13.5897	C27H42O5	C16497	4.15616e+07	5.12594e+07	79.8	921185	252721	113.18	45.12	5.5	0.00177468	2.75	0.0478235	1.8648	pos
N-Acetyl-L-2-amino-6-oxopimelate	M231T146_1	231.097	146.4	0.00402029	C9H13NO6	C05539	1.2234e+08	9.41977e+07	65.75	3.11229e+07	4.09551e+07	63.71	3.93	1.97	0.00179811	2.75	0.0478548	1.885	pos
Isophorone	M139T678	139.112	678.2	0.891369	C9H14O	C14743	1.62119e+08	1.46533e+08	71.71	3.75312e+07	3.22128e+07	57.01	4.32	2.11	0.00314131	2.5	0.0663313	1.8045	pos
Oleamide	M282T787	282.278	786.8	4.16611	C18H35NO	C19670	1.91533e+08	1.6675e+08	57.64	6.01513e+07	3.58229e+07	108.58	3.18	1.67	0.00320132	2.49	0.0671417	1.81753	pos
Dehydrocostus lactone	M231T601	231.142	600.7	17.4095	C15H18O2	C09387	4.60858e+06	4.42392e+06	48.04	1.81687e+06	1.61709e+06	41.25	2.54	1.34	0.00383465	2.42	0.0731476	1.79254	pos
L-Idonate	M196T425	196.062	424.7	17.3418	C6H12O7	C00770	3.20736e+06	2965284	44.22	1.56801e+06	1.65234e+06	27.87	2.05	1.03	0.00502119	2.3	0.103732	1.78352	neg
L-Ascorbic acid, 6-octadecanoate	M441T738	441.283	737.9	5.49307	C24H42O7	C20340	1.341e+06	1.25238e+06	54.9	479302	345248	88.91	2.8	1.48	0.00552035	2.26	0.106964	1.81359	neg
Gluconolactone	M178T145	178.052	145.2	26.3967	C6H10O6	C00198	4.33445e+06	3.76317e+06	64.15	1.24082e+06	788504	87.13	3.49	1.8	0.00795623	2.1	0.104631	1.67536	pos
Dodecanedioic acid	M231T678	231.159	678.5	0.761381	C12H22O4	C02678	1.64623e+07	1.65158e+07	28.87	7.67006e+06	6.68342e+06	51.48	2.15	1.1	0.00857763	2.07	0.10841	1.66403	pos
24-Methylenecycloartanol	M441T761	441.371	761	4.84063	C31H52O	C08830	1.53747e+08	1.52663e+08	59.65	5.17678e+07	2.51863e+07	72.81	2.97	1.57	0.00959284	2.02	0.114333	1.64378	pos
dGMP	M347T857	347.171	856.6	1.24749	C10H14N5O7P	C00362	4.23267e+06	4.55023e+06	18.88	2.07412e+06	1.89085e+06	59.07	2.04	1.03	0.00974172	2.01	0.134231	1.80414	neg
Pyridoxine	M170T159	170.081	158.7	3.93468	C8H11NO3	C00314	9.59337e+07	9.53202e+07	26.7	4.6605e+07	4.83222e+07	57.78	2.06	1.04	0.0102092	1.99	0.117891	1.71087	pos
5-Dehydroavenasterol	M411T905	411.361	904.6	1.64332	C29H46O	C15783	2.57613e+07	2.27751e+07	51	1.11077e+07	1.05188e+07	65.27	2.32	1.21	0.0108895	1.96	0.121484	1.61759	pos
Adenine	M136T146	136.061	145.7	4.96836	C5H5N5	C00147	6.0666e+08	4.91722e+08	48.08	2.51963e+08	1.47514e+08	94.39	2.41	1.27	0.0117256	1.93	0.125627	1.60471	pos
N6-(Delta2-Isopentenyl)-adenine	M204T315	204.123	314.6	0.817677	C10H13N5	C04083	3.24329e+07	2.66863e+07	31.71	9.73332e+06	3.87128e+06	93.79	3.33	1.74	0.0122944	1.91	0.128781	1.74405	pos
Enol-phenylpyruvate	M165T173	165.055	172.9	0.145406	C9H8O3	C02763	7.40291e+08	6.28919e+08	59.62	3.37639e+08	3.58398e+08	27.74	2.19	1.13	0.0132159	1.88	0.133312	1.6017	pos
Biopterin	M237T260	237.092	260.2	22.776	C9H11N5O3	C06313	7.29337e+06	7.18988e+06	53.63	2.35846e+06	646808	120.08	3.09	1.63	0.0140677	1.85	0.155269	1.72449	neg
N-Glycolylneuraminic acid	M324T78	324.094	78.4	1.77726	C11H19NO10	C03410	2.34408e+08	2.15619e+08	75.04	6.96489e+07	6.9875e+07	54.96	3.37	1.75	0.014097	1.85	0.155499	1.66925	neg
Subaphylline	M264T400	264.142	400.5	18.5506	C14H20N2O3	C10497	3.60138e+07	1.92159e+07	159.36	5.23772e+06	5.62032e+06	47.54	6.88	2.78	0.016776	1.78	0.148592	1.53726	pos
(S)-Reticuline	M329T430	329.149	430.3	0.161104	C19H23NO4	C02105	2.40913e+06	854256	121.85	497796	229729	127.55	4.84	2.27	0.0169837	1.77	0.14965	1.53752	pos
Prostaglandin G2	M369T638	369.225	637.5	6.70594	C20H32O6	C05956	5.42926e+06	5.47323e+06	35.97	2.57247e+06	1.38181e+06	89.53	2.11	1.08	0.0170141	1.77	0.14974	1.54331	pos
N-Arachidonyl dopamine	M422T689	422.29	688.9	25.4943	C28H41NO3	C12271	1.82603e+07	1.77055e+07	88.5	2.92461e+06	2.51458e+06	46.05	6.24	2.64	0.0175783	1.76	0.151988	1.6188	pos
Luteolin	M285T367	285.041	367.2	1.75413	C15H10O6	C01514	4.4312e+06	4.00085e+06	50.86	2.09605e+06	1.78286e+06	56.09	2.11	1.08	0.0180531	1.74	0.17277	1.57034	neg
4-Chloroprogesterone	M349T514	349.2	513.8	21.8332	C21H29ClO2	C14676	2.53267e+06	1.83214e+06	58.24	985465	1.18642e+06	59.7	2.57	1.36	0.0191854	1.72	0.15831	1.51138	pos
L-Lysine	M147T524	147.112	523.6	3.23562	C6H14N2O2	C00047	9.69225e+06	4.90593e+06	119.24	830384	875657	13.47	11.67	3.54	0.0192814	1.71	0.158596	1.66917	pos
Cathasterone	M433T930	433.368	930.2	1.90139	C28H48O3	C15790	6.76548e+06	5.87554e+06	49.25	2.03335e+06	974247	84.48	3.33	1.73	0.0194006	1.71	0.159084	1.60803	pos
Dethiobiotin	M213T272	213.125	271.6	1.29502	C10H18N2O3	C01909	1.96389e+07	1.53873e+07	111.62	3.97126e+06	2.57052e+06	88.32	4.95	2.31	0.0198527	1.7	0.180928	1.56656	neg
(R)-10-Hydroxystearate	M300T825	300.273	824.9	20.6479	C18H36O3	C03195	4.14526e+07	3.86409e+07	61.12	1.63224e+07	1.40897e+07	42.63	2.54	1.34	0.0200513	1.7	0.161565	1.49287	pos
Sinapoyl aldehyde	M208T573	208.078	572.5	19.224	C11H12O4	C05610	1.39913e+07	1.18785e+07	50.36	6.59982e+06	6.03536e+06	43.54	2.12	1.08	0.0204778	1.69	0.183468	1.54143	neg
D-Mannose	M179T88_2	179.055	87.9	0.423229	C6H12O6	C00159	2.03049e+09	1.63124e+09	85.82	536502060	5.80696e+08	54.94	3.78	1.92	0.0205599	1.69	0.183468	1.57338	neg
Homo-L-arginine	M188T516	188.128	516.3	5.31552	C7H16N4O2	C01924	3.02233e+07	1.74315e+07	102.33	1.80277e+06	1.38804e+06	106.49	16.76	4.07	0.0224322	1.65	0.169242	1.49533	pos
Procaine	M237T328	237.159	328	2.75714	C13H20N2O2	C07375	6.3337e+07	3.23229e+07	100.47	1.83873e+07	1.83135e+07	44.06	3.44	1.78	0.0238016	1.62	0.173145	1.4689	pos
Gamabufogenin	M402T811	402.23	811.1	25.6066	C24H34O5	C16962	3.92468e+07	3.46098e+07	73.21	1.44243e+07	13950830	42.57	2.72	1.44	0.0239345	1.62	0.17355	1.4832	pos
Betulin	M425T856	425.377	856.2	3.76137	C30H50O2	C08618	2.4634e+07	2.274e+07	40.1	1.22991e+07	5.73705e+06	78.52	2	1	0.0253833	1.6	0.178269	1.45806	pos
Bufotalin	M445T853	445.257	852.6	4.21328	C26H36O6	C16923	1.84005e+07	1.53222e+07	49.15	8.71268e+06	9.80017e+06	62.78	2.11	1.08	0.0258866	1.59	0.180139	1.45901	pos
N(6)-[(Indol-3-yl)acetyl]-L-lysine	M286T525	286.155	525	15.1459	C16H21N3O3	C04211	1.89315e+07	1.76076e+07	63.98	5.47162e+06	3.00102e+06	127.89	3.46	1.79	0.0285024	1.55	0.187543	1.46298	pos
Kynurenic acid	M190T559	190.049	558.8	4.08316	C10H7NO3	C01717	5.42517e+07	3.66444e+07	108.53	1.50113e+07	1.40581e+07	45.04	3.61	1.85	0.0289352	1.54	0.188872	1.46564	pos
Dopamine	M136T203	136.076	203.5	29.6453	C8H11NO2	C03758	1.11133e+09	1.21698e+09	55.12	4.5045e+08	3.60059e+08	65.2	2.47	1.3	0.0291174	1.54	0.18948	1.43716	pos
Eschscholtzxanthin	M567T736	567.403	735.9	28.8605	C40H54O2	C08593	1.14227e+08	5.72015e+07	148.85	1.62054e+07	1.29093e+07	54.43	7.05	2.82	0.0291373	1.54	0.189508	1.48954	pos
Rutin	M593T918	593.157	917.9	19.7823	C27H30O16	C05625	5.81716e+07	5.46603e+07	39.31	2.29305e+07	2.9584e+07	58.23	2.54	1.34	0.0296	1.53	0.190909	1.5291	pos
N-Acetyl-a-neuraminic acid	M308T80_2	308.099	79.5	1.54496	C11H19NO9	C19909	1.69603e+09	1.68721e+09	47.75	7.32327e+08	3.23305e+08	99.02	2.32	1.21	0.0304446	1.52	0.215501	1.4786	neg
Kaempferol	M287T654	287.055	654	0.613123	C15H10O6	C05903	1.95646e+06	361987	134.12	181750	122194	63.23	10.76	3.43	0.0304809	1.52	0.193653	1.50146	pos
10,11-Epoxy-3-geranylgeranylindole	M388T830	388.306	830.3	25.3261	C28H39NO	C20526	2.74868e+07	2.30566e+07	49.09	1.32439e+07	1.56704e+07	44.51	2.08	1.05	0.0308377	1.51	0.194747	1.43513	pos
4-Hydroxycinnamoylagmatine	M276T229	276.144	229	1.43149	C14H20N4O2	C04498	7.63587e+07	6.23422e+07	110.15	1.89821e+07	1.96232e+07	18.1	4.02	2.01	0.0320768	1.49	0.198537	1.51892	pos
Eupatilin	M343T368	343.085	367.8	8.95738	C18H16O7	C10040	1.6634e+06	2.05965e+06	44.89	792190	331093	102.06	2.1	1.07	0.0322567	1.49	0.220309	1.47273	neg
(2S,5S)-trans-Carboxymethylproline	M174T142_1	174.089	142.5	8.35948	C7H11NO4	C17366	1.95927e+06	425779	127.72	257502	231728	25.69	7.61	2.93	0.0325126	1.49	0.199687	1.51909	pos
L-Arginine	M175T84_2	175.119	84.2	0	C6H14N4O2	C00062	1.48646e+09	1.14048e+09	70.06	6.42851e+08	5.19027e+08	89.69	2.31	1.21	0.0408174	1.39	0.222882	1.36806	pos
Sodium deoxycholate	M415T780	415.21	779.9	1.87488	C24H39O4. Na	C11171	3.2023e+07	1.42114e+07	125.91	5.40333e+06	2.51347e+06	105.43	5.93	2.57	0.0408378	1.39	0.222882	1.3551	pos
beta-Carotene	M536T875	536.158	875.1	11.7845	C40H56	C02094	1.28392e+08	9.28892e+07	87.88	3.14385e+07	8.08864e+06	122.81	4.08	2.03	0.0410306	1.39	0.223322	1.37332	pos
1-Hexadecanol	M241T575	241.039	574.6	1.50372	C16H34O	C00823	1.50352e+07	6.65603e+06	151.47	4.17366e+06	3.52174e+06	79.32	3.6	1.85	0.0449003	1.35	0.256542	1.42479	neg
ATP	M507T885_1	507.121	885.4	0.932936	C10H16N5O13P3	C00002	3.66312e+07	4.21632e+07	44.28	1.55411e+07	1.1919e+07	82.26	2.36	1.24	0.0485138	1.31	0.265995	1.36539	neg
Primidone	M219T340	219.113	339.6	0.0168315	C12H14N2O2	C07371	1.02345e+07	8159704	53.15	3.9767e+06	4.47012e+06	78.45	2.57	1.36	0.0494786	1.31	0.242891	1.38802	pos
