# Supplementary material for: Integrated gut microbiome and metabolome analysis reveals the inhibition effect of Lactobacillus plantarum CBT against colorectal cancer
Source: Royal Society of Chemistry journal article supplement (doi:10.1039/d3fo04806c), 2023-12-07
Supplement: d3fo04806c7.xlsx [file d3fo04806c7.xlsx]

## Sheet: data-heatmap-63
name	M1	M2	M3	M4	M5	M6	M7	LP1	LP2	LP3	LP4	LP5	LP6	LP7
Phenyl acetate	-0.475337	-0.708691	-0.586873	-0.738357	-0.267762	-0.669727	-0.517606	3.05578	-0.113498	0.0496518	0.299718	-0.470109	0.943612	0.199195
Kaempferol	-0.453157	-0.328259	-0.482224	-0.48182	-0.471574	-0.473419	-0.402944	-0.352154	2.95906	-0.414727	-0.431121	-0.421235	0.30212	1.45146
Gluconolactone	-0.841862	-0.486468	-0.648944	-0.90555	0.29476	-0.773199	-0.826533	1.77601	0.173998	0.658884	2.24409	-0.291766	-0.750717	0.377303
L-Ascorbic acid	-0.773102	0.667898	-0.843237	-1.02884	-0.713711	-0.9632	-0.473291	2.57982	-0.593625	0.468361	0.519206	0.912774	-0.168086	0.409025
(S)-Reticuline	-0.541804	-0.421078	-0.537197	-0.546003	-0.539422	-0.567432	0.204129	-0.264131	3.05923	-0.320754	-0.406761	-0.416402	0.112378	1.18525
3-geranylgeranylindole	-0.362311	-0.0967105	-0.626579	-0.377503	-0.850144	-0.2119	-1.48314	2.85974	0.964469	-0.104673	0.2164	-0.314803	0.101946	0.285207
Eschscholtzxanthin	-0.348152	-0.359651	-0.41396	-0.435262	-0.259729	-0.449673	-0.448694	-0.424147	-0.23059	0.111779	-0.0634302	-0.382052	0.324708	3.37885
N(6)-[(Indol-3-yl)acetyl]-L-lysine	-0.668948	-0.99171	-1.00619	-0.0757178	-0.780103	0.545977	-1.01767	1.05419	2.2639	-0.915819	1.13914	-0.115644	0.11022	0.458377
L-Idonate	-0.0904275	-0.397818	-0.557464	-1.03679	-0.768101	-0.968201	-0.530913	-0.708905	0.993579	0.437874	0.00210036	0.210599	0.686573	2.72789
6-Ketoprostaglandin E1	-0.723567	-0.679358	-0.705246	-0.811467	-0.692003	-0.637673	-0.68289	0.658016	-0.340071	0.652133	1.79421	2.15216	-0.576166	0.591922
L-Malic acid	-0.485097	-0.725298	-0.594181	-0.751081	-0.269677	-0.680432	-0.517998	3.04392	-0.0878343	0.0738512	0.342758	-0.477957	0.921953	0.207075
ATP	0.702846	-1.25636	-1.22342	-1.11272	-0.168834	-0.293744	-0.796199	1.15881	1.53579	1.16214	0.903531	-1.16708	0.449817	0.105414
L-Lysine	-0.483166	-0.475079	-0.481976	-0.494016	-0.481936	-0.511721	-0.480768	-0.0390558	3.0775	-0.472919	-0.195491	-0.512762	1.03885	0.512537
Eupatilin	-0.626591	-1.03577	-1.02626	-1.16246	1.07682	0.534399	-1.24995	1.19791	1.43722	0.103325	0.97424	-0.768436	-0.406493	0.952043
dGMP	0.811145	-1.14584	-1.35819	-1.66004	-0.351566	-0.843215	-0.497985	-0.102279	0.932903	0.0842824	0.695736	1.18746	1.26207	0.985526
5-Dehydroavenasterol	-1.07304	-0.122485	0.339995	-1.05956	-0.32152	-0.622425	-1.1738	0.341308	0.169987	0.389038	2.75006	-0.0376878	0.833555	-0.413417
Dehydrocostus lactone	-0.950377	-0.742372	-0.851662	-0.12273	-0.371655	-0.42727	-1.07988	2.38728	1.31907	-0.221622	-0.620409	0.0577002	0.563507	1.06042
beta-Carotene	-0.793448	0.0932537	-0.815663	-0.764941	0.0531863	-0.753192	-0.577572	2.34537	-0.772923	1.87573	0.588387	-0.169818	-0.44442	0.136048
Carbamoyl phosphate	-0.564654	-0.794964	-0.781709	-0.390871	-0.588341	-0.467799	-0.803065	2.65949	1.49349	0.154344	0.63273	-0.521183	-0.208522	0.181055
Enol-phenylpyruvate	-0.486762	-0.702369	-0.876482	-0.330721	-0.374637	-0.224621	-0.80346	2.97011	0.715854	0.242492	0.721275	-0.631231	-0.441557	0.22211
Subaphylline	-0.343386	-0.421044	-0.338111	-0.368178	-0.355857	-0.273162	-0.454775	-0.0334347	3.42178	-0.323527	-0.321242	-0.328946	0.145072	-0.00519297
N-Acetyl-a-neuraminic acid	0.950522	-1.16588	-0.998856	-1.13766	0.0116754	-0.264854	-1.17673	0.822497	1.54889	0.450838	1.59057	-0.916716	-0.244657	0.530367
Dopamine	-0.544874	-0.731922	-0.8363	-1.11465	0.0912169	0.149176	-1.03564	2.01997	1.63367	0.0966303	0.885286	-0.865946	-0.505074	0.758453
4-Hydroxycinnamoylagmatine	-0.412918	-0.550662	-0.382462	-0.435008	-0.450358	-0.461364	-0.421886	0.227557	3.27373	-0.383522	0.408715	-0.50184	0.404141	-0.314126
Phytanic acid	-0.850677	-0.61868	-0.986131	-0.890048	-0.818889	-0.635149	-1.02085	0.938863	0.569734	-0.248818	0.219492	1.44687	0.991728	1.90255
Sinapic acid	-0.689049	-0.465193	-0.606045	-0.664504	-0.395494	-0.533019	-0.998566	3.03284	0.334545	-0.0120232	0.78478	0.0384024	0.331332	-0.158008
Stearidonic acid	-0.699798	-0.484065	-1.05499	-0.538421	-0.902597	-0.387207	-0.832296	0.681297	0.587264	1.11599	2.54518	-0.645441	0.504426	0.110662
N-Acetyl-L-2-amino-6-oxopimelate	-0.462052	-0.486511	-0.243688	-0.907232	-0.867277	-0.910034	-0.464714	2.776	-0.206751	-0.143496	0.271892	0.237517	0.00234203	1.40401
N6-(Delta2-Isopentenyl)-adenine	-1.14492	-1.28075	-1.15754	-0.19673	-0.170073	0.0228042	-1.35767	1.94255	0.371865	0.15014	0.194959	0.372724	0.853304	1.39934
Sodium deoxycholate	-0.198083	-0.523909	-0.578598	-0.33806	-0.586206	-0.189743	-0.598546	1.05373	3.12101	-0.145591	-0.55932	-0.341374	-0.366751	0.251447
4-Chloroprogesterone	-0.888229	-0.425825	-0.336948	-1.21214	0.0815606	-0.877122	-0.368085	-0.0337516	2.33981	-0.207933	1.94522	-0.372327	0.301442	0.0543317
Sinapoyl aldehyde	-0.48901	-0.0785991	-1.38192	-0.661845	-0.666852	-0.679386	-0.0614518	0.245917	0.18365	2.81341	1.09175	-0.110077	-0.464927	0.259342
Procaine	-0.456188	-0.496655	-0.450106	-0.754227	-0.237084	-0.307517	-0.481088	0.201711	3.16684	-0.241036	-0.271382	-0.469857	-0.172759	0.969348
Carboxymethylproline	-0.459803	-0.45751	-0.451347	-0.466251	-0.417767	-0.37806	-0.477674	-0.377284	3.12922	-0.427729	-0.397702	-0.356239	0.885682	0.652464
Epoxystearic acid	-0.64422	-0.662675	-0.648044	-0.651356	-0.675199	-0.615625	-0.802606	0.885766	1.2473	0.462174	0.520559	-0.643294	2.54601	-0.318787
Prostaglandin G2	-1.139	0.370753	-1.05459	-1.17862	-1.00312	1.08867	-1.03486	0.58177	1.3132	0.422819	1.24766	0.148982	-0.870016	1.10636
Cathasterone	-0.313479	-0.151006	-0.968243	-0.0303682	-0.983268	-1.01489	-1.22071	0.664129	1.03941	0.354796	2.5342	0.115569	-0.443421	0.417276
Biopterin	-1.03808	-0.601937	-1.0508	-1.00415	0.673915	-0.0191307	-1.10994	2.19833	0.668815	0.568008	1.3819	-0.476738	-0.136802	-0.0533831
Protoporphyrin IX	-0.401957	2.36831	1.93055	-0.307861	-0.107284	-0.559028	0.951284	-0.490913	-0.560123	-0.412826	-0.589022	-0.617487	-0.579892	-0.623759
Bufadienolide	0.490727	0.762327	1.90289	1.20725	0.680782	-1.04608	0.401127	-0.0817405	0.415022	-0.36545	-0.774557	-1.35623	-1.37216	-0.863915
alpha-Tocopherol	2.23382	0.707432	-0.0782558	-0.387999	-0.650256	-0.134466	0.677827	-0.409358	-0.796985	1.83802	-0.655	-0.823767	-0.700827	-0.820186
N2-Succinyl-L-ornithine	0.565849	1.45466	1.60997	-0.169359	0.21386	-0.793334	1.61747	0.0234093	-0.955918	0.234152	-0.82838	-1.1733	-0.872653	-0.926421
Riboflavin	-0.0673451	0.956109	0.408136	-0.320024	-0.28896	-0.241748	2.75295	0.0358845	-0.888874	0.832375	-0.554573	-0.925881	-0.870626	-0.827423
L-Threonine	-0.20099	0.648366	2.44028	1.11923	-0.348342	-0.501172	1.21623	-0.561002	-0.621523	-0.0544528	-0.329833	-0.821804	-1.09652	-0.888463
gamma-Glutamylcysteine	0.0374716	1.62019	0.845792	-0.190439	-0.241515	-0.598325	2.47999	-0.301516	-0.684033	0.171488	-0.80761	-0.818006	-0.770739	-0.742746
Citrulline	0.505497	0.457537	2.44441	0.239285	0.494918	-0.460131	1.13294	-0.242021	-1.24809	0.115902	-0.665458	-1.1516	-0.659311	-0.963889
L-Histidinol	0.0701627	0.358547	1.81646	-0.855832	0.200736	0.145082	1.98522	-0.741579	-0.854227	0.835582	-0.0353054	-0.99867	-0.980714	-0.945459
Nopaline	0.0422432	2.63453	0.883702	-0.1529	-0.129559	-0.69649	0.525565	0.83108	-0.836338	0.29137	-0.87398	-1.07311	-0.862685	-0.583424
6-Keto-prostaglandin F1a	1.63405	0.714758	1.72839	0.588497	0.517616	-0.991016	0.152494	-0.456603	-0.248199	0.609715	-0.868479	-1.15154	-1.06907	-1.16061
Retinoyl b-glucuronide	3.18967	-0.0273476	-0.00210682	-0.438522	0.486794	-0.473644	0.690411	-0.55792	-0.457882	-0.503796	-0.417498	-0.42644	-0.546434	-0.515281
Sorbitol	1.3996	0.309126	1.55081	0.571973	-0.470428	-0.304361	1.38283	-0.567315	-0.528587	0.69867	-0.262238	-1.42694	-1.28679	-1.06635
1-Arachidonoylglycerol	0.845706	0.73776	2.55358	-0.563723	-0.297397	0.204412	0.457918	0.493907	-0.934149	-0.306738	-0.0220937	-1.09608	-1.0196	-1.0535
Kyotorphin	0.66269	0.00460874	1.32597	0.350193	1.34712	-0.724654	1.87889	-0.932988	-0.828116	-1.04179	0.33706	-0.462122	-0.913492	-1.00336
T2 Toxin	0.625807	-0.694124	0.356549	2.28734	-0.0305133	0.75891	-0.367347	1.50343	-0.984161	-0.607501	-0.912243	-0.146019	-0.926014	-0.864123
(5-L-Glutamyl)-L-glutamate	0.732036	0.476066	0.675575	-0.152684	-0.274517	-0.585576	2.63395	-0.185632	-0.779344	0.868407	-0.616746	-1.01214	-0.984375	-0.795023
Dammarenediol II	0.592388	0.930833	1.32252	0.0197958	0.891155	-0.907204	1.84344	-0.561624	-1.26483	-1.00797	-0.445849	-0.464341	0.307644	-1.25597
gamma-Glutamylalanine	0.115548	1.51101	0.721092	-0.018944	0.27993	-0.492215	2.228	0.0932965	-1.28479	0.348161	-0.769409	-1.06578	-0.867948	-0.797949
p-Hydroxyphenylacetic acid	1.85628	0.102674	0.761077	1.5104	0.647191	-0.73391	0.15132	0.992859	-0.738209	-0.955744	-1.00174	-0.942953	-0.879097	-0.770147
1-Methyladenosine	0.333112	2.09154	0.716311	0.391638	0.234518	-0.46723	1.49282	0.563152	-0.645713	-0.646083	-1.05597	-1.17556	-1.01269	-0.819837
Gentisic acid	0.685975	1.34925	1.36049	-0.107882	0.106927	0.935399	0.430111	-0.982244	-1.37499	-1.36571	-1.40242	-0.412967	-0.165232	0.943293
L-Kynurenine	0.38338	0.670496	0.654307	-0.208927	0.0394697	-0.624722	3.02802	-0.659466	-0.470052	-0.260783	-0.522039	-0.704978	-0.654169	-0.670539
11Z-Eicosenoic acid	0.0197877	0.571694	0.209158	2.85935	0.209756	-0.113488	0.972282	-0.782546	-0.541175	-0.349458	-0.714743	-1.01559	-0.620845	-0.704179
Hydantoin-5-propionic acid	0.663054	0.30557	1.92072	2.02995	-0.167404	-0.535374	0.746868	-1.00192	-0.534083	-0.399222	-0.887728	-0.599127	-0.796978	-0.744326
