# Supplementary material for: Integrated gut microbiome and metabolome analysis reveals the inhibition effect of Lactobacillus plantarum CBT against colorectal cancer
Source: Royal Society of Chemistry journal article supplement (doi:10.1039/d3fo04806c), 2023-12-07
Supplement: d3fo04806c8.xlsx [file d3fo04806c8.xlsx]

## Sheet: Sheet1
name	NC1	NC2	NC3	NC4	NC5	NC6	NC7	M1	M2	M3	M4	M5	M6	M7	LP1	LP2	LP3	LP4	LP5	LP6	LP7
L-Lysine	2.76315e+07	8.92001e+07	7.46401e+07	9.08527e+07	3.24609e+07	1.0324e+07	9.38905e+06	864828	938419	875657	766108	876025	604999	886652	4.90593e+06	3.32645e+07	958077	3.48248e+06	595524	1.47142e+07	9.92505e+06
N(6)-[(Indol-3-yl)acetyl]-L-lysine	4.01594e+07	7.28151e+07	6.46072e+07	3.50977e+07	6.24717e+07	4.17128e+06	2.24703e+06	4.31198e+06	505332	334529	1.13085e+07	3.00102e+06	1.86408e+07	199131	2.46347e+07	3.89019e+07	1.40039e+06	2.56366e+07	1.08376e+07	1.35015e+07	1.76076e+07		Luteolin
10,11-Epoxy-3-geranylgeranylindole	3.68167e+07	3.73522e+07	3.6774e+07	2.4901e+07	2.98361e+07	1.34745e+07	2.74366e+07	1.58594e+07	1.91626e+07	1.25727e+07	1.56704e+07	9.7923e+06	1.773e+07	1.91991e+06	5.59312e+07	3.23602e+07	1.90635e+07	2.30566e+07	1.64502e+07	2.16332e+07	2.39124e+07
Carbamoyl phosphate	1.59463e+07	2.23078e+07	2.26255e+07	2.60379e+07	1.52897e+07	1.70026e+07	1.78929e+07	1.0265e+07	3.02783e+06	3.44436e+06	1.5726e+07	9.5207e+06	1.33086e+07	2.77328e+06	1.1158e+08	7.49396e+07	3.28587e+07	4.78913e+07	1.1631e+07	2.14561e+07	3.3698e+07
Citrulline	7.89276e+06	3.67946e+06	6.71583e+06	1.89249e+06	5.45153e+06	3.91929e+06	2.86936e+06	1.20511e+07	1.17549e+07	2.40229e+07	1.04073e+07	1.19857e+07	6.08875e+06	1.59252e+07	7.43548e+06	1.2235e+06	9.64549e+06	4.82095e+06	1.81927e+06	4.85891e+06	2.97828e+06
N2-Succinyl-L-ornithine	7.25636e+06	7.16107e+06	7.86576e+06	2.9292e+06	6.07779e+06	5.23481e+06	2.9522e+06	3.95474e+07	5.66647e+07	5.96558e+07	2.53883e+07	3.27686e+07	1.33714e+07	5.98002e+07	2.91008e+07	1.02403e+07	3.31594e+07	1.26965e+07	6.05375e+06	1.18438e+07	1.08083e+07		N-Glycolylneuraminic acid
(5-L-Glutamyl)-L-glutamate	2.10086e+06	6.88147e+06	2.03783e+06	4.97796e+06	1.88612e+06	2.94621e+06	2.64018e+06	2.58572e+07	2.26672e+07	2.51536e+07	1.48313e+07	1.33129e+07	9.43635e+06	4.956e+07	1.44207e+07	7.0215e+06	2.75567e+07	9.0479e+06	4.12031e+06	4.46628e+06	6.82611e+06
(2S,5S)-trans-Carboxymethylproline	3.02083e+07	2.99932e+07	4.08974e+07	2.85052e+07	3.51558e+07	1.22876e+07	6.90843e+06	227335	231728	243538	214978	307882	383965	193090	385453	7.10443e+06	288792	346329	425779	2.80548e+06	2.3586e+06
L-Lysine	24.7198	26.4105	26.1534	26.437	24.9522	23.2995	23.1625	19.7221	19.8399	19.74	19.5472	19.7406	19.2066	19.758	22.2261	24.9875	19.8698	21.7317	19.1838	23.8107	23.2426
N(6)-[(Indol-3-yl)acetyl]-L-lysine	25.2592	26.1177	25.9452	25.0649	25.8967	21.9921	21.0996	22.0399	18.9469	18.3518	23.4309	21.517	24.152	17.6034	24.5542	25.2133	20.4174	24.6117	23.3695	23.6866	24.0697
10,11-Epoxy-3-geranylgeranylindole	25.1339	25.1547	25.1322	24.5697	24.8306	23.6837	24.7096	23.9188	24.1918	23.5838	23.9015	23.2232	24.0797	20.8726	25.7372	24.9477	24.1843	24.4587	23.9716	24.3667	24.5113
Carbamoyl phosphate	23.9267	24.411	24.4314	24.6341	23.8661	24.0193	24.0929	23.2912	21.5299	21.7158	23.9066	23.1826	23.6659	21.4032	26.7335	26.1592	24.9698	25.5133	23.4715	24.3549	25.0062
Citrulline	22.9121	21.8111	22.6791	20.8519	22.3782	21.9022	21.4523	23.5227	23.4868	24.5179	23.3111	23.5148	22.5377	23.9248	22.826	20.2226	23.2014	22.2009	20.7949	22.2122	21.506
N2-Succinyl-L-ornithine	22.7908	22.7717	22.9072	21.4821	22.5351	22.3197	21.4934	25.2371	25.7559	25.8302	24.5977	24.9658	23.6726	25.8336	24.7946	23.2877	24.9829	23.5979	22.5294	23.4976	23.3656
(5-L-Glutamyl)-L-glutamate	21.0025	22.7143	20.9586	22.2471	20.847	21.4904	21.3322	24.6241	24.4341	24.5843	23.8221	23.6663	23.1698	25.5627	23.7816	22.7433	24.7159	23.1092	21.9743	22.0906	22.7026
(2S,5S)-trans-Carboxymethylproline	24.8484	24.8381	25.2855	24.7647	25.0673	23.5507	22.7199	17.7945	17.8221	17.8938	17.7138	18.232	18.5506	17.5589	18.5562	22.7603	18.1397	18.4018	18.6997	21.4198	21.1695

## Sheet: LOG2
name	NC1	NC2	NC3	NC4	NC5	NC6	NC7	M1	M2	M3	M4	M5	M6	M7	LP1	LP2	LP3	LP4	LP5	LP6	LP7
L-Lysine	24.7198	26.4105	26.1534	26.437	24.9522	23.2995	23.1625	19.7221	19.8399	19.74	19.5472	19.7406	19.2066	19.758	22.2261	24.9875	19.8698	21.7317	19.1838	23.8107	23.2426
N(6)-[(Indol-3-yl)acetyl]-L-lysine	25.2592	26.1177	25.9452	25.0649	25.8967	21.9921	21.0996	22.0399	18.9469	18.3518	23.4309	21.517	24.152	17.6034	24.5542	25.2133	20.4174	24.6117	23.3695	23.6866	24.0697
10,11-Epoxy-3-geranylgeranylindole	25.1339	25.1547	25.1322	24.5697	24.8306	23.6837	24.7096	23.9188	24.1918	23.5838	23.9015	23.2232	24.0797	20.8726	25.7372	24.9477	24.1843	24.4587	23.9716	24.3667	24.5113
Carbamoyl phosphate	23.9267	24.411	24.4314	24.6341	23.8661	24.0193	24.0929	23.2912	21.5299	21.7158	23.9066	23.1826	23.6659	21.4032	26.7335	26.1592	24.9698	25.5133	23.4715	24.3549	25.0062
Citrulline	22.9121	21.8111	22.6791	20.8519	22.3782	21.9022	21.4523	23.5227	23.4868	24.5179	23.3111	23.5148	22.5377	23.9248	22.826	20.2226	23.2014	22.2009	20.7949	22.2122	21.506
N2-Succinyl-L-ornithine	22.7908	22.7717	22.9072	21.4821	22.5351	22.3197	21.4934	25.2371	25.7559	25.8302	24.5977	24.9658	23.6726	25.8336	24.7946	23.2877	24.9829	23.5979	22.5294	23.4976	23.3656
(5-L-Glutamyl)-L-glutamate	21.0025	22.7143	20.9586	22.2471	20.847	21.4904	21.3322	24.6241	24.4341	24.5843	23.8221	23.6663	23.1698	25.5627	23.7816	22.7433	24.7159	23.1092	21.9743	22.0906	22.7026
(2S,5S)-trans-Carboxymethylproline	24.8484	24.8381	25.2855	24.7647	25.0673	23.5507	22.7199	17.7945	17.8221	17.8938	17.7138	18.232	18.5506	17.5589	18.5562	22.7603	18.1397	18.4018	18.6997	21.4198	21.1695
